# Inferring the timing and strength of natural selection and gene migration in the evolution of chicken from ancient DNA data

Wenyang Lyu<sup>a</sup>, Xiaoyang Dai<sup>b,1</sup>, Mark Beaumont<sup>b</sup>, Feng Yu<sup>a,\*</sup>, Zhangyi He<sup>c,2,\*</sup>

<sup>a</sup>*School of Mathematics, University of Bristol, Bristol BS8 1UG, United Kingdom*

<sup>b</sup>*School of Biological Sciences, University of Bristol, Bristol BS8 1TQ, United Kingdom*

<sup>c</sup>*MRC Toxicology Unit, University of Cambridge, Cambridge CB2 1QR, United Kingdom*

---

## Abstract

With the rapid growth of the number of sequenced ancient genomes, there has been increasing interest in using this new information to study past and present adaptation. Such an additional temporal component has the promise of providing improved power for the estimation of natural selection. Over the last decade, statistical approaches for detection and quantification of natural selection from ancient DNA (aDNA) data have been developed. However, most of the existing methods do not allow us to estimate the timing of natural selection along with its strength, which is key to understanding the evolution and persistence of organismal diversity. Additionally, most methods ignore the fact that natural populations are almost always structured, which can result in overestimation of the effect of natural selection. To address these issues, we introduce a novel Bayesian framework for the inference of natural selection and gene migration from aDNA data with Markov chain Monte Carlo techniques, co-estimating both timing and strength of natural selection and gene migration. Such an advance enables us to infer drivers of natural selection and gene migration by correlating genetic evolution with potential causes such as the changes in the ecological context in which an organism has evolved. The performance of our procedure is evaluated through extensive simulations, with its utility shown with an application to ancient chicken samples.

*Keywords:* Natural selection, Gene migration, Continent-island model, Wright-Fisher diffusion, Hidden Markov model, Blockwise particle marginal Metropolis-Hastings

---

\*Corresponding author.

*Email addresses:* [feng.yu@bristol.ac.uk](mailto:feng.yu@bristol.ac.uk) (Feng Yu), [z.he@beatson.gla.ac.uk](mailto:z.he@beatson.gla.ac.uk) (Zhangyi He)

<sup>1</sup>Present address: The Blizard Institute, Barts and The London School of Medicine and Dentistry, Queen Mary University of London, London E1 2AT, United Kingdom

<sup>2</sup>Present address: Cancer Research UK Beatson Institute, Glasgow G61 1BD, United Kingdom

## 1. Introduction

With modern advances in ancient DNA (aDNA) techniques, there has been a rapid increase in the availability of time serial samples of segregating alleles across one or more related populations. The temporal aspect of such samples reflects the combined evolutionary forces acting within and among populations such as genetic drift, natural selection and gene migration, which can contribute to our understanding of how these evolutionary forces shape the patterns observed in contemporaneous samples. One of the most powerful applications of such genetic time series is to study the action of natural selection since the expected changes in allele frequencies over time are closely related to the timing and strength of natural selection.

Over the past fifteen years, there has been a growing literature on the statistical inference of natural selection from time series data of allele frequencies, especially in aDNA (see Malaspinas, 2016; Dehasque et al., 2020, for excellent reviews). Typically, estimating natural selection from genetic time series is built on the hidden Markov model (HMM) framework proposed by Bollback et al. (2008), where the allele frequency trajectory of the underlying population through time was modelled as a latent variable following the Wright-Fisher model introduced by Fisher (1922) and Wright (1931), and the allele frequency of the sample drawn from the underlying population at each sampling time point was modelled as a noisy observation of the latent population allele frequency. In their likelihood computation, the Wright-Fisher model was approximated through its standard diffusion limit, known as the Wright-Fisher diffusion, which was then discretised for numerical integration with a finite difference scheme. Their approach was applied to analyse the aDNA data associated with horse coat colouration in Ludwig et al. (2009) and extended to more complex evolutionary scenarios (see, *e.g.*, Malaspinas et al., 2012; Steinrücken et al., 2014; Ferrer-Admetlla et al., 2016; Schraiber et al., 2016; He et al., 2020b,c).

Natural populations are almost always structured, which affects the relative effect of natural selection and genetic drift on the changes in allele frequencies over time. This can cause overestimation of the selection coefficient (Mathieson et al., 2015). However, all existing methods based on the Wright-Fisher model for the inference of natural selection from temporally-spaced allele frequency data lack the ability to account for the confounding effect of gene migration, with the exception of Mathieson & McVean (2013), which could model population structure. Mathieson & McVean (2013) is an extension of Bollback et al. (2008) for the inference of metapopulations,

31 which enables the co-estimation of the selection coefficient and the migration rate from genetic  
32 time series. However, their method could become computationally cumbersome for large popu-  
33 lation sizes and evolutionary timescales since their likelihood computation was carried out with  
34 the Wright-Fisher model. High computational costs for large evolutionary timescales become a  
35 strong limitation for the analysis of aDNA.

36 More recently, Loog et al. (2017) introduced a Bayesian statistical framework for estimating  
37 the timing and strength of selection from genetic time series while explicitly modelling migration  
38 from external sources. Their approach also allows the co-estimation of the underlying population  
39 allele frequency trajectory through time, which is important for understanding the drivers of  
40 selection. However, the population size is assumed to be large enough in their method to ignore  
41 genetic drift, which simplifies the likelihood computation but restricts the application to aDNA.

42 In this work, we develop a novel HMM-based approach for the Bayesian inference of natural  
43 selection and gene migration to re-analyse the ancient chicken samples from Loog et al. (2017).  
44 Our method is built upon the HMM framework of Bollback et al. (2008), but unlike most existing  
45 approaches, it allows the joint estimation of the timing and strength of selection and migration.  
46 Such an advance enables us to infer the drivers of selection and migration by correlating genetic  
47 evolution with ecological and cultural shifts. Our main innovation is to introduce a multi-allele  
48 Wright-Fisher diffusion for a single locus evolving under natural selection and gene migration,  
49 including the timing of selection and migration. This diffusion process characterises the allele  
50 frequency trajectories of the underlying population over time, where the alleles that migrate from  
51 external sources are distinguished from those that originate in the underlying population. Such  
52 a setup allows a full using of available quantities such as the proportion of the modern European  
53 chicken that have Asian origin as a direct result of gene migration. Our posterior computation  
54 is carried out through the particle marginal Metropolis-Hastings (PMMH) algorithm of Andrieu  
55 et al. (2010) with blockwise sampling, which permits a joint update of the underlying population  
56 allele frequency trajectories. We evaluate the performance of our procedure through extensive  
57 simulations, with its utility shown with an application to the ancient chicken samples.

## 58 **2. Materials and Methods**

59 In this section, we first introduce the multi-allele Wright-Fisher diffusion for a single locus  
60 evolving under natural selection and gene migration and then present our Bayesian method for

61 the joint inference of selection and migration from time series allele frequency data.

## 62 2.1. Wright-Fisher diffusion

63 Let us consider a population of  $N$  randomly mating diploid individuals at a single locus  $\mathcal{A}$   
64 with discrete and nonoverlapping generations, where the population size  $N$  is finite and fixed  
65 over time. Suppose that at locus  $\mathcal{A}$  there are two allele types, labelled  $\mathcal{A}_1$  and  $\mathcal{A}_2$ , respectively.  
66 We attach the symbol  $\mathcal{A}_1$  to the mutant allele, which arises only once in the population and is  
67 positively selected once the evolution starts to act through selection, and we attach the symbol  
68  $\mathcal{A}_2$  to the ancestral allele, which originally exists in the population.

69 According to Loog et al. (2017), we characterise the population structure with the continent-  
70 island model (see, *e.g.*, Hamilton, 2011, for an introduction). More specifically, the population is  
71 subdivided into two demes, the continental population and the island population. To distinguish  
72 between the alleles found on the island but emigrated from the continent or were originally on  
73 the island, the mutant and ancestral alleles that originated on the island are labelled  $\mathcal{A}_1^i$  and  
74  $\mathcal{A}_2^i$ , respectively, and the mutant and ancestral alleles that were results of emigration from the  
75 continent are labelled  $\mathcal{A}_1^c$  and  $\mathcal{A}_2^c$ , respectively. Such a setup enables us to trace the alleles that  
76 migrate from external sources evolving in the island population, thereby allowing the integration  
77 of available information such as the proportion of the modern European chicken that have Asian  
78 origin in the inference of selection. Suppose that the continent population is large enough such  
79 that gene migration between the continent and the island does not affect the genetic composition  
80 of the continent population. Our interests focus on the island population dynamics so in what  
81 follows the population refers to the island population unless noted otherwise.

82 To investigate the island population dynamics under natural selection and gene migration,  
83 we specify the life cycle of the island population, which starts with zygotes that selection acts  
84 on. Selection takes the form of viability selection, and the relative viabilities of all genotypes  
85 are shown in Table 1, where  $s \in [0, 1]$  is the selection coefficient, and  $h \in [0, 1]$  is the dominance  
86 parameter. After selection, a fraction  $m$  of the adults on the continent migrate into the popu-  
87 lation of mating adults on the island, which causes the change of the genetic composition of the  
88 island population, *i.e.*, fraction  $m$  of the adults on the island are immigrants from the continent,  
89 and fraction  $1 - m$  of adults were originally already on the island. The Wright-Fisher repro-  
90 duction introduced by Fisher (1922) and Wright (1931) finally completes the life cycle, which



91 corresponds to randomly sampling  $2N$  gametes with replacement from an effectively infinite  
 92 gamete pool to form new zygotes in the next generation through random union of gametes.

|                   | $\mathcal{A}_1^i$ | $\mathcal{A}_2^i$ | $\mathcal{A}_1^c$ | $\mathcal{A}_2^c$ |
|-------------------|-------------------|-------------------|-------------------|-------------------|
| $\mathcal{A}_1^i$ | 1                 | $1 - hs$          | 1                 | $1 - hs$          |
| $\mathcal{A}_2^i$ | $1 - hs$          | $1 - s$           | $1 - hs$          | $1 - s$           |
| $\mathcal{A}_1^c$ | 1                 | $1 - hs$          | 1                 | $1 - hs$          |
| $\mathcal{A}_2^c$ | $1 - hs$          | $1 - s$           | $1 - hs$          | $1 - s$           |

Table 1: Relative viabilities of all possible genotypes at locus  $\mathcal{A}$  when we distinguish between the alleles that originate on the island and the alleles that emigrate from the continent.

93 We let  $\mathbf{X}^{(N)}(k) = (X_1^{(N)}(k), X_2^{(N)}(k), X_3^{(N)}(k), X_4^{(N)}(k))$  denote the frequencies of the  $\mathcal{A}_1^i$ ,  
 94  $\mathcal{A}_2^i$ ,  $\mathcal{A}_1^c$  and  $\mathcal{A}_2^c$  alleles in  $N$  zygotes of generation  $k \in \mathbb{N}$  on the island, which follows the multi-  
 95 allele Wright-Fisher model with selection and migration described in Supplemental Information,  
 96 File S1. We assume that the selection coefficient and the migration rate are both of order  $1/(2N)$   
 97 and fixed from the time of the onset of selection and migration up to present. We run time at  
 98 rate  $2N$ , *i.e.*,  $t = k/(2N)$ , and like Cherry & Wakeley (2003), we scale the selection coefficient  
 99 and the migration rate as

$$\alpha(t) = \begin{cases} 0, & \text{if } t < t_s \\ 2Ns, & \text{otherwise} \end{cases} \quad \text{and} \quad \beta(t) = \begin{cases} 0, & \text{if } t < t_m \\ 2Nm, & \text{otherwise,} \end{cases}$$

100 where  $t_s$  and  $t_m$  are the starting times of selection and migration on the island measured in the  
 101 units of  $2N$  generations. As the population size  $N$  tends to infinity, the Wright-Fisher model  
 102  $\mathbf{X}^{(N)}$  converges to a diffusion process, denoted by  $\mathbf{X} = \{\mathbf{X}(t), t \geq t_0\}$ , evolving in the state  
 103 space  $\Omega_{\mathbf{X}} = \{\mathbf{x} \in [0, 1]^4 : \sum_{i=1}^4 x_i = 1\}$  and satisfying the stochastic differential equation (SDE)  
 104 of the form

$$d\mathbf{X}(t) = \boldsymbol{\mu}(\mathbf{X}(t), t)dt + \boldsymbol{\sigma}(\mathbf{X}(t), t)d\mathbf{W}(t), \quad t \geq t_0 \quad (1)$$

105 with initial condition  $\mathbf{X}(t_0) = \mathbf{x}_0$ . In Eq. (1),  $\boldsymbol{\mu}(\mathbf{x}, t)$  is the drift term

$$\begin{aligned} \mu_1(\mathbf{x}, t) &= \alpha(t)x_1(x_2 + x_4) [(x_1 + x_3)h + (x_2 + x_4)(1 - h)] - \beta(t)x_1 \\ \mu_2(\mathbf{x}, t) &= -\alpha(t)x_2(x_1 + x_3) [(x_1 + x_3)h + (x_2 + x_4)(1 - h)] - \beta(t)x_2 \\ \mu_3(\mathbf{x}, t) &= \alpha(t)x_3(x_2 + x_4) [(x_1 + x_3)h + (x_2 + x_4)(1 - h)] - \beta(t)(x_3 - x_c) \\ \mu_4(\mathbf{x}, t) &= -\alpha(t)x_4(x_1 + x_3) [(x_1 + x_3)h + (x_2 + x_4)(1 - h)] - \beta(t)(x_4 + x_c - 1), \end{aligned} \quad (2)$$

106 where  $x_c$  is the frequency of the  $\mathcal{A}_1^c$  allele in the continent population, which is fixed over time,  
 107  $\sigma(\mathbf{x}, t)$  is the diffusion term

$$\sigma(\mathbf{x}, t) = \begin{pmatrix} \sqrt{x_1 x_2} & \sqrt{x_1 x_3} & \sqrt{x_1 x_4} & 0 & 0 & 0 \\ -\sqrt{x_2 x_1} & 0 & 0 & \sqrt{x_2 x_3} & \sqrt{x_2 x_4} & 0 \\ 0 & -\sqrt{x_3 x_1} & 0 & -\sqrt{x_3 x_2} & 0 & \sqrt{x_3 x_4} \\ 0 & 0 & -\sqrt{x_4 x_1} & 0 & -\sqrt{x_4 x_2} & -\sqrt{x_4 x_3} \end{pmatrix}, \quad (3)$$

108 and  $\mathbf{W}(t)$  is a six-dimensional standard Brownian motion. The explicit formula for the diffusion  
 109 term  $\sigma(\mathbf{x}, t)$  in Eq. (3) is obtained by following He et al. (2020a). The proof of the convergence  
 110 follows in the similar manner to that employed for the neutral two-locus case in Durrett (2008,  
 111 p. 323). We refer to the stochastic process  $\mathbf{X} = \{\mathbf{X}(t), t \geq t_0\}$  that solves the SDE in Eq. (1)  
 112 as the multi-allele Wright-Fisher diffusion with selection and migration.

## 113 2.2. Bayesian inference of natural selection and gene migration

114 Suppose that the available data are sampled from the underlying island population at time  
 115 points  $t_1 < t_2 < \dots < t_K$ , which are measured in units of  $2N$  generations to be consistent with  
 116 the Wright-Fisher diffusion timescale. At the sampling time point  $t_k$ , there are  $c_k$  mutant alleles  
 117 (*i.e.*, the  $\mathcal{A}_1^i$  and  $\mathcal{A}_1^c$  alleles) and  $d_k$  continent alleles (*i.e.*, the  $\mathcal{A}_1^c$  and  $\mathcal{A}_2^c$  alleles) observed in the  
 118 sample of  $n_k$  chromosomes drawn from the underlying island population. Note that in real data,  
 119 the continent allele count of the sample may not be available at each sampling time point, *e.g.*,  
 120 the proportion of the European chicken that have Asian origin is only available in the modern  
 121 sample (Loog et al., 2017). The population genetic parameters of interest are the scaled selection  
 122 coefficient  $\alpha = 2Ns$ , the dominance parameter  $h$ , the selection time  $t_s$ , the scaled migration rate  
 123  $\beta = 2Nm$ , and the migration time  $t_m$ , as well as the underlying allele frequency trajectories of  
 124 the island population. For simplicity, in the sequel we let  $\boldsymbol{\vartheta}_s = (\alpha, h, t_s)$  be the selection-related  
 125 parameters and  $\boldsymbol{\vartheta}_m = (\beta, t_m)$  be the migration-related parameters, respectively.

### 126 2.2.1. Hidden Markov model

127 We apply an HMM framework similar to the one proposed in Bollback et al. (2008), where the  
 128 underlying population evolves under the Wright-Fisher diffusion in Eq. (1) and the observations  
 129 are modelled through independent sampling from the underlying population at each given time

130 point. Unlike Loog et al. (2017), we jointly estimate the timing and strength of selection and  
131 migration, including the allele frequency trajectories of the underlying population. Our Wright-  
132 Fisher diffusion can directly trace the temporal changes in the frequencies of the alleles in the  
133 island population that results from emigrants from the continent population. We can therefore  
134 make the most of other available information like the proportion of the modern European chicken  
135 with Asian ancestry in the most recent sample reported in Loog et al. (2017), which provides  
136 valuable information regarding the timing and strength of migration.

137 Let  $\mathbf{x}_{1:K} = (\mathbf{x}_1, \mathbf{x}_2, \dots, \mathbf{x}_K)$  be the allele frequency trajectories of the underlying population  
138 at the sampling time points  $\mathbf{t}_{1:K}$ . Under our HMM framework, the joint posterior probability  
139 distribution for the population genetic quantities of interest and the allele frequency trajectories  
140 of the underlying population is

$$p(\boldsymbol{\vartheta}_s, \boldsymbol{\vartheta}_m, \mathbf{x}_{1:K} \mid \mathbf{c}_{1:K}, \mathbf{d}_{1:K}) \propto p(\boldsymbol{\vartheta}_s, \boldsymbol{\vartheta}_m) p(\mathbf{x}_{1:K} \mid \boldsymbol{\vartheta}_s, \boldsymbol{\vartheta}_m) p(\mathbf{c}_{1:K}, \mathbf{d}_{1:K} \mid \mathbf{x}_{1:K}, \boldsymbol{\vartheta}_s, \boldsymbol{\vartheta}_m), \quad (4)$$

141 where  $p(\boldsymbol{\vartheta}_s, \boldsymbol{\vartheta}_m)$  is the prior probability distribution for the population genetic quantities and  
142 can be taken to be a uniform distribution over the parameter space if their prior knowledge is  
143 poor,  $p(\mathbf{x}_{1:K} \mid \boldsymbol{\vartheta}_s, \boldsymbol{\vartheta}_m)$  is the probability distribution for the allele frequency trajectories of the  
144 underlying population at the sampling time points  $\mathbf{t}_{1:K}$ , and  $p(\mathbf{c}_{1:K}, \mathbf{d}_{1:K} \mid \mathbf{x}_{1:K}, \boldsymbol{\vartheta}_s, \boldsymbol{\vartheta}_m)$  is the  
145 probability of the observations at the sampling time points  $\mathbf{t}_{1:K}$  conditional on the underlying  
146 population allele frequency trajectories.

147 With the Markov property of the Wright-Fisher diffusion, we have

$$p(\mathbf{x}_{1:K} \mid \boldsymbol{\vartheta}_s, \boldsymbol{\vartheta}_m) = p(\mathbf{x}_1 \mid \boldsymbol{\vartheta}_s, \boldsymbol{\vartheta}_m) \prod_{k=1}^{K-1} p(\mathbf{x}_{k+1} \mid \mathbf{x}_k; \boldsymbol{\vartheta}_s, \boldsymbol{\vartheta}_m), \quad (5)$$

148 where  $p(\mathbf{x}_1 \mid \boldsymbol{\vartheta}_s, \boldsymbol{\vartheta}_m)$  is the prior probability distribution for the allele frequencies of the under-  
149 lying population at the initial sampling time point, commonly taken to be non-informative (*e.g.*,  
150 flat over the entire state space) if the prior knowledge is poor, and  $p(\mathbf{x}_{k+1} \mid \mathbf{x}_k; \boldsymbol{\vartheta}_s, \boldsymbol{\vartheta}_m)$  is the  
151 transition probability density function of the Wright-Fisher diffusion between two consecutive  
152 sampling time points for  $k = 1, 2, \dots, K - 1$ , which satisfies the Kolmogorov backward equation  
153 (or its adjoint) resulting from the Wright-Fisher diffusion in Eq. (1). Unless otherwise specified,  
154 in this work we take the prior  $p(\mathbf{x}_1 \mid \boldsymbol{\vartheta}_s, \boldsymbol{\vartheta}_m)$  to be a uniform distribution over the state space

155  $\Omega_{\mathbf{X}}$ , known as the flat Dirichlet distribution, if migration starts before the first sampling time  
 156 point, *i.e.*,  $t_m \leq t_1$ ; otherwise, the prior  $p(\mathbf{x}_1 | \boldsymbol{\vartheta}_s, \boldsymbol{\vartheta}_m)$  is set to be a uniform distribution over  
 157 the state space  $\Omega_{\mathbf{X}}$  restricted to the line satisfying the condition that  $x_3 = x_4 = 0$ , *i.e.*, there is  
 158 no continent allele in the island population.

159 Given the allele frequency trajectories of the underlying population, the observations at each  
 160 sampling time point are independent. Therefore, we have

$$p(\mathbf{c}_{1:K}, \mathbf{d}_{1:K} | \mathbf{x}_{1:K}, \boldsymbol{\vartheta}_s, \boldsymbol{\vartheta}_m) = \prod_{k=1}^K p(c_k, d_k | \mathbf{x}_k; \boldsymbol{\vartheta}_s, \boldsymbol{\vartheta}_m), \quad (6)$$

161 where  $p(c_k, d_k | \mathbf{x}_k; \boldsymbol{\vartheta}_s, \boldsymbol{\vartheta}_m)$  is the probability of the observations at the sampling time point  $t_k$   
 162 given its corresponding allele frequencies of the underlying population for  $k = 1, 2, \dots, K$ . If  
 163 the sample continent allele count  $d_k$  is available, we introduce  $\mathbf{z}_k = (z_{1,k}, z_{2,k}, z_{3,k}, z_{4,k})$  to be  
 164 the counts of the  $\mathcal{A}_1^i$ ,  $\mathcal{A}_2^i$ ,  $\mathcal{A}_1^c$  and  $\mathcal{A}_2^c$  alleles in the sample at the  $k$ -th sampling time point, and  
 165 the emission probability  $p(c_k, d_k | \mathbf{x}_k; \boldsymbol{\vartheta}_s, \boldsymbol{\vartheta}_m)$  can be expressed as

$$p(c_k, d_k | \mathbf{x}_k; \boldsymbol{\vartheta}_s, \boldsymbol{\vartheta}_m) = \sum_{\mathbf{z}_k \in \Omega_{\mathbf{Z}_k}} \frac{n_k!}{\prod_{i=1}^4 z_{i,k}!} \prod_{i=1}^4 x_{i,k}^{z_{i,k}} \mathbb{1}_{\{z_{1,k} + z_{3,k} = c_k, z_{2,k} + z_{4,k} = d_k\}}(\mathbf{z}_k),$$

166 where  $\Omega_{\mathbf{Z}_k} = \{\mathbf{z}_k \in \mathbb{N}^4 : \sum_{i=1}^4 z_{i,k} = n_k\}$  and  $\mathbb{1}_A$  is the indicator function that equals to 1 if  
 167 condition  $A$  holds and 0 otherwise. Otherwise, the emission probability  $p(c_k, d_k | \mathbf{x}_k; \boldsymbol{\vartheta}_s, \boldsymbol{\vartheta}_m)$   
 168 can be reduced to

$$p(c_k, d_k | \mathbf{x}_k; \boldsymbol{\vartheta}_s, \boldsymbol{\vartheta}_m) = \frac{n_k!}{c_k!(n_k - c_k)!} (x_{1,k} + x_{3,k})^{c_k} (x_{2,k} + x_{4,k})^{n_k - c_k}.$$

### 169 2.2.2. Particle marginal Metropolis-Hastings

170 The most challenging part in the computation of the posterior  $p(\boldsymbol{\vartheta}_s, \boldsymbol{\vartheta}_m, \mathbf{x}_{1:K} | \mathbf{c}_{1:K}, \mathbf{d}_{1:K})$  is  
 171 obtaining the transition probability density function  $p(\mathbf{x}_{k+1} | \mathbf{x}_k; \boldsymbol{\vartheta}_s, \boldsymbol{\vartheta}_m)$  for  $k = 1, 2, \dots, K-1$ .  
 172 In principle, the transition probability density function can be achieved by numerically solving  
 173 the Kolmogorov backward equation (or its adjoint) resulting from the Wright-Fisher diffusion in  
 174 Eq. (1) typically through a finite difference scheme (Bollback et al., 2008; He et al., 2020c). This  
 175 requires a fine discretisation of the state space  $\Omega_{\mathbf{X}}$  to guarantee numerically stable computation  
 176 of the solution, but how fine the discretisation needs to be strongly depends on the underlying

177 population genetic quantities that we aim to estimate (He et al., 2020a). We therefore resort to  
 178 the PMMH algorithm of Andrieu et al. (2010) in this work. The PMMH algorithm only involves  
 179 simulating the Wright-Fisher SDE in Eq. (1) and permits a joint update of the population genetic  
 180 parameters and the allele frequency trajectories of the underlying population.

181 In our PMMH-based procedure, the marginal likelihood

$$p(\mathbf{c}_{1:K}, \mathbf{d}_{1:K} \mid \boldsymbol{\vartheta}_s, \boldsymbol{\vartheta}_m) = \int_{\Omega_{\mathbf{X}}^K} p(\mathbf{x}_{1:K} \mid \boldsymbol{\vartheta}_s, \boldsymbol{\vartheta}_m) p(\mathbf{c}_{1:K}, \mathbf{d}_{1:K} \mid \mathbf{x}_{1:K}, \boldsymbol{\vartheta}_s, \boldsymbol{\vartheta}_m) d\mathbf{x}_{1:K}$$

182 is estimated with the bootstrap particle filter developed by Gordon et al. (1993), where the par-  
 183 ticles are generated by simulating the Wright-Fisher SDE in Eq. (1) with the Euler-Maruyama  
 184 scheme. The product of the average weights of the set of particles at the sampling time points  
 185  $\mathbf{t}_{1:K}$  yields an unbiased estimate of the marginal likelihood  $p(\mathbf{c}_{1:K}, \mathbf{d}_{1:K} \mid \boldsymbol{\vartheta}_s, \boldsymbol{\vartheta}_m)$ , and the un-  
 186 derlying population allele frequency trajectories  $\mathbf{x}_{1:K}$  are sampled once from the final set of  
 187 particles with their corresponding weights. Since the strength of selection and migration can be  
 188 strongly correlated with their timing, we adopt a blockwise updating scheme to avoid the small  
 189 acceptance ratio of the PMMH with full dimensional updates. We partition the population ge-  
 190 netic parameters into two blocks, the selection-related parameters  $\boldsymbol{\vartheta}_s$  and the migration-related  
 191 parameters  $\boldsymbol{\vartheta}_m$ , respectively, and iteratively update one block at a time through the PMMH.

192 More specifically, we first generate a set of the initial candidates of the parameters  $(\boldsymbol{\vartheta}_s, \boldsymbol{\vartheta}_m)$   
 193 from the prior  $p(\boldsymbol{\vartheta}_s, \boldsymbol{\vartheta}_m)$ . We then run a bootstrap particle filter with the proposed parameters  
 194  $(\boldsymbol{\vartheta}_s, \boldsymbol{\vartheta}_m)$  to obtain a marginal likelihood estimate  $\hat{p}(\mathbf{c}_{1:K}, \mathbf{d}_{1:K} \mid \boldsymbol{\vartheta}_s, \boldsymbol{\vartheta}_m)$  and an initial candidate  
 195 of the underlying population allele frequency trajectories  $\mathbf{x}_{1:K}$ . Repeat the following steps until  
 196 a sufficient number of the samples of the parameters  $(\boldsymbol{\vartheta}_s, \boldsymbol{\vartheta}_m)$  and the underlying population  
 197 allele frequency trajectories  $\mathbf{x}_{1:K}$  have been obtained:

198 Step 1: Update the selection-related parameters  $\boldsymbol{\vartheta}_s$ .

199 Step 1a: Draw  $\boldsymbol{\vartheta}_s^* \sim q_s(\cdot \mid \boldsymbol{\vartheta}_s)$ .

200 Step 1b: Run a bootstrap particle filter with  $(\boldsymbol{\vartheta}_s^*, \boldsymbol{\vartheta}_m)$  to yield  $\hat{p}(\mathbf{c}_{1:K}, \mathbf{d}_{1:K} \mid \boldsymbol{\vartheta}_s^*, \boldsymbol{\vartheta}_m)$  and

201  $\mathbf{x}_{1:K}^*$ .

202 Step 1c: Accept  $\boldsymbol{\vartheta}_s^*$  and  $\mathbf{x}_{1:K}^*$  with

$$A = \frac{p(\boldsymbol{\vartheta}_s^*, \boldsymbol{\vartheta}_m) \hat{p}(\mathbf{c}_{1:K}, \mathbf{d}_{1:K} \mid \boldsymbol{\vartheta}_s^*, \boldsymbol{\vartheta}_m) q_s(\boldsymbol{\vartheta}_s \mid \boldsymbol{\vartheta}_s^*)}{p(\boldsymbol{\vartheta}_s, \boldsymbol{\vartheta}_m) \hat{p}(\mathbf{c}_{1:K}, \mathbf{d}_{1:K} \mid \boldsymbol{\vartheta}_s, \boldsymbol{\vartheta}_m) q_s(\boldsymbol{\vartheta}_s^* \mid \boldsymbol{\vartheta}_s)}$$

203 otherwise set  $\boldsymbol{\vartheta}_s^* = \boldsymbol{\vartheta}_s$  and  $\boldsymbol{x}_{1:K}^* = \boldsymbol{x}_{1:K}$ .

204 Step 2: Update the migration-related parameters  $\boldsymbol{\vartheta}_m$ .

205 Step 2a: Draw  $\boldsymbol{\vartheta}_m^* \sim q_m(\cdot \mid \boldsymbol{\vartheta}_m)$ .

206 Step 2b: Run a bootstrap particle filter with  $(\boldsymbol{\vartheta}_s^*, \boldsymbol{\vartheta}_m^*)$  to yield  $\hat{p}(\boldsymbol{c}_{1:K}, \boldsymbol{d}_{1:K} \mid \boldsymbol{\vartheta}_s^*, \boldsymbol{\vartheta}_m^*)$  and

207  $\boldsymbol{x}_{1:K}^*$ .

208 Step 2c: Accept  $\boldsymbol{\vartheta}_m^*$  and  $\boldsymbol{x}_{1:K}^*$  with

$$A = \frac{p(\boldsymbol{\vartheta}_s^*, \boldsymbol{\vartheta}_m^*) \hat{p}(\boldsymbol{c}_{1:K}, \boldsymbol{d}_{1:K} \mid \boldsymbol{\vartheta}_s^*, \boldsymbol{\vartheta}_m^*) q_m(\boldsymbol{\vartheta}_m \mid \boldsymbol{\vartheta}_m^*)}{p(\boldsymbol{\vartheta}_s^*, \boldsymbol{\vartheta}_m) \hat{p}(\boldsymbol{c}_{1:K}, \boldsymbol{d}_{1:K} \mid \boldsymbol{\vartheta}_s^*, \boldsymbol{\vartheta}_m) q_m(\boldsymbol{\vartheta}_m^* \mid \boldsymbol{\vartheta}_m)}$$

209 otherwise set  $\boldsymbol{\vartheta}_m^* = \boldsymbol{\vartheta}_m$  and  $\boldsymbol{x}_{1:K}^* = \boldsymbol{x}_{1:K}$ .

210 In this work we use random walk proposals for both selection- and migration-related parameters  
211 in our blockwise PMMH algorithm unless otherwise specified.

212 Once enough samples of the parameters  $(\boldsymbol{\vartheta}_s, \boldsymbol{\vartheta}_m)$  and the underlying population allele fre-  
213 quency trajectories  $\boldsymbol{x}_{1:K}$  have been yielded, we can compute the posterior  $p(\boldsymbol{\vartheta}_s, \boldsymbol{\vartheta}_m \mid \boldsymbol{c}_{1:K}, \boldsymbol{d}_{1:K})$   
214 from the samples of the parameters  $(\boldsymbol{\vartheta}_s, \boldsymbol{\vartheta}_m)$  using nonparametric density estimation techniques  
215 (see Izenman, 1991, for a review) and achieve the maximum a posteriori probability (MAP) esti-  
216 mates for the population genetic parameters. Our estimates for the underlying population allele  
217 frequency trajectories are the posterior mean of the stored samples of the underlying population  
218 allele frequency trajectories. Our approach can be readily extended to the analysis of multiple  
219 (independent) loci. Given that the migration-related parameters are shared by all loci, in each  
220 iteration we only need to replicate Step 1 once to update selection-related parameters specified  
221 for each locus and then update migration-related parameters with shared by all loci in Step 2,  
222 where the likelihood is replaced by the product of the likelihoods for each locus.

### 223 3. Results

224 In this section, we first evaluate the performance of our approach using simulated datasets  
225 with various population genetic parameter values and then apply it to re-analyse the time series  
226 allele frequency data from ancient chicken in Loog et al. (2017) genotyped at the locus encoding  
227 for the thyroid-stimulating hormone receptor (*TSHR*), which is hypothesised to have undergone  
228 strong and recent selection in domestic chicken.

### 229 3.1. Robustness and performance

230 To assess our method, we ran forward-in-time simulations of the multi-allele Wright-Fisher  
231 model with selection and migration described in File S1 and examined the bias and the root mean  
232 square error (RMSE) of our estimates obtained from these replicate simulations. Here we varied  
233 the selection coefficient  $s \in \{0.003, 0.006, 0.009\}$  and the dominance parameter  $h \in \{0, 0.5, 1\}$   
234 and fixed the migration rate  $m = 0.005$ . We adopted the selection time  $k_s = 180$  and varied  
235 the migration time  $k_m \in \{90, 360\}$ , which were measured in generations. In addition, we varied  
236 the population size  $N \in \{5000, 50000, 500000\}$ . In principle, the conclusions we draw here hold  
237 for other values of the population genetic parameters in similar ranges.

238 More specifically, we ran two groups of simulation. For the first group, we fix the dominance  
239 parameter  $h = 0.5$  and vary all other parameters in the sets specified above, yielding a total of  
240 18 parameter combinations. For the second group, we fix the population size  $N = 50000$  and  
241 vary all other parameters, yielding another 18 parameter combinations. Due to overlap between  
242 these two groups, we have a total of 30 parameter combinations, for each of which we performed  
243 300 replicated runs. For each run, we took the starting allele frequencies of the underlying island  
244 population at generation 0 (*i.e.*, the first sampling time point) to be  $\mathbf{x}_1 = (0.4, 0.6, 0, 0)$  and the  
245 mutant allele frequency of the underlying continent population to be  $x_c = 0.9$ . These values  
246 are similar to those of ancient chicken samples reported in Loog et al. (2017). We simulated a  
247 total of 500 generations under the multi-allele Wright-Fisher model with selection and migration  
248 and generated a multinomial sample of 100 chromosomes from the underlying island population  
249 every 50 generations from generation 0, 11 sampling time points in total. At each sampling time  
250 point, we generated the mutant allele count by summing the first and third components of the  
251 simulated sample allele counts, and the continent allele count by summing the third and fourth  
252 components since in real data only mutant allele counts and continent allele counts are available.  
253 Additionally, in real data the continent allele count of the sample may not be available at each  
254 sampling time point (*e.g.*, Loog et al., 2017). To explore the impact of missing continent allele  
255 counts, we assumed that the continent allele counts of the sample were unavailable at the first  
256 three and seven sampling time points, respectively, for each run in our simulation studies, as  
257 shown in simulated datasets A and B, respectively, in Figure 1.

258 In our procedure, we chose a uniform prior over the interval  $[-1, 1]$  for the selection coefficient



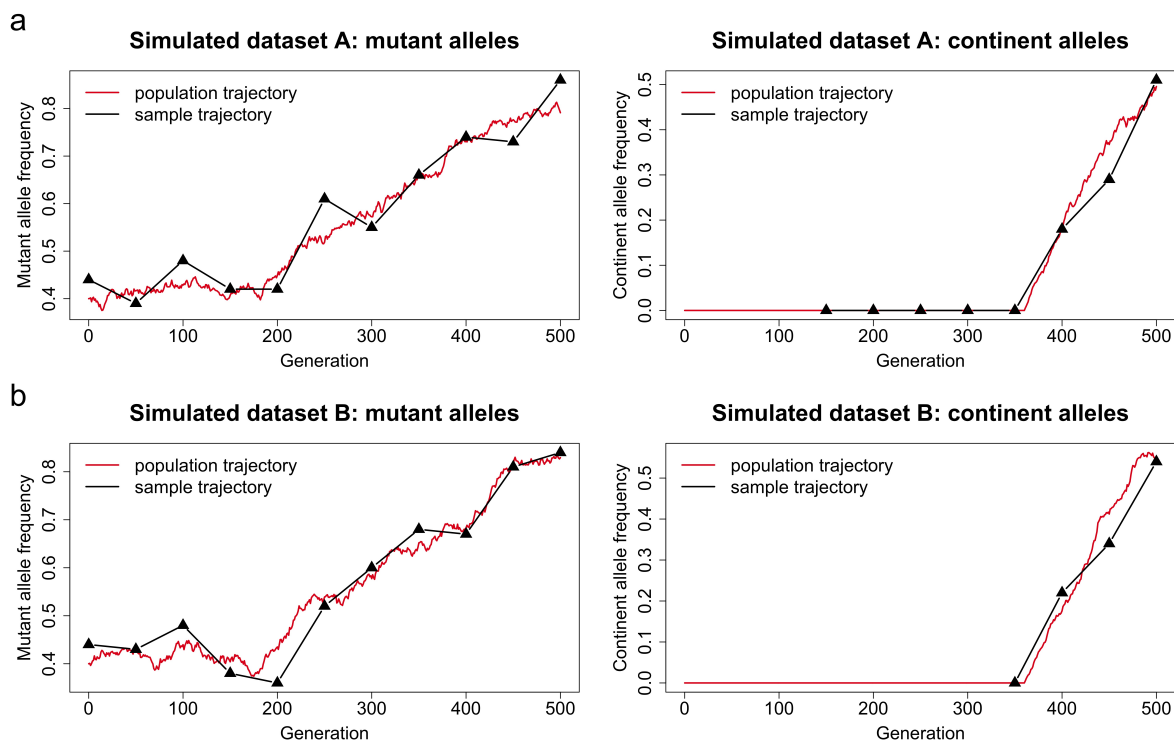

Figure 1: Representative examples of the datasets simulated using the Wright-Fisher model with selection and migration. We take the selection coefficient and time to be  $s = 0.006$  and  $k_s = 180$  and the migration rate and time to be  $m = 0.005$  and  $k_m = 360$ , respectively. We set the dominance parameter  $h = 0.5$  and the population size  $N = 5000$ . We adopt the starting allele frequencies of the underlying island population  $\mathbf{x}_1 = (0.4, 0.6, 0, 0)$  and the mutant allele frequency of the underlying continent population  $x_c = 0.9$ . We sample 100 chromosomes at every 50 generations from generation 0 to 500. (a) simulated dataset A: continent allele counts are not available at the first three sampling time points. (b) simulated dataset B: continent allele counts of the sample are not available at the first seven sampling time points.

259  $s$  and a uniform prior over the interval  $[0, 1]$  for the migration rate  $m$ . We let the starting times  
 260 of selection and migration  $k_s$  and  $k_m$  be uniformly distributed over the set of all possible time  
 261 points, *i.e.*,  $k_s, k_m \in \{k \in \mathbb{Z} : k \leq 500\}$ . We generated 10000 iterations of the blockwise PMMH  
 262 with 1000 particles, and in the Euler-Maruyama scheme each generation was divided into five  
 263 subintervals. We discarded the first half of the iterations as the burn-in period and then thinned  
 264 the remaining PMMH output by selecting every fifth value. See Figures 2 and 3 for our posteriors  
 265 for the timing and strength of selection and migration based on the simulated datasets shown in  
 266 Figure 1, including our estimates for the mutant and continent allele frequency trajectories of the  
 267 underlying island population. Evidently, our approach is capable of identifying the selection and  
 268 migration signatures and accurately estimate their timing and strength in these two examples.  
 269 The underlying frequency trajectories of the mutant and continent alleles in island population  
 270 are both well matched with our estimates, *i.e.*, the allele frequency trajectories of the underlying

271 island population fluctuate slightly around our estimates and are completely covered by our 95%  
 272 highest posterior density (HPD) intervals.

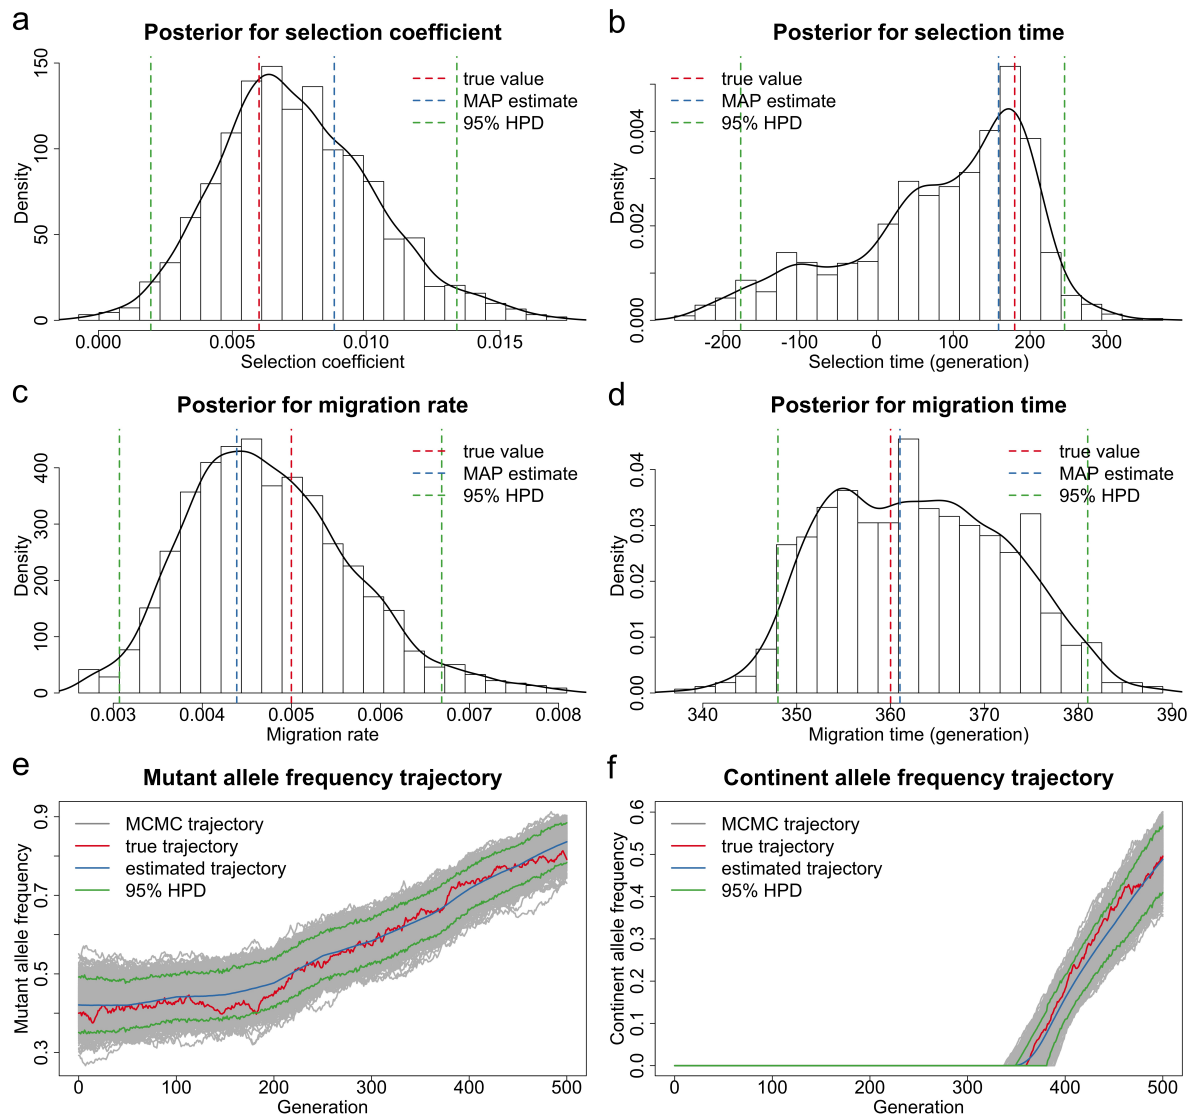

Figure 2: Bayesian estimates for the dataset shown in Figure 1a simulated for the case of the continent allele counts unavailable at the first three sampling time points. Posteriors for (a) the selection coefficient (b) the selection time (c) the migration rate and (d) the migration time. The MAP estimate is for the joint posterior, and may not correspond to the mode of the marginals. Estimated underlying trajectories of (e) the mutant allele frequency and (f) the continent allele frequency of the island population.

273 In Figure 4, we present the boxplots of our estimates for additive selection ( $h = 0.5$ ) where  
 274 continent allele counts are not available at the first three sampling time points. These boxplots  
 275 show the relative bias of (a) the selection coefficient estimates, (b) the selection time estimates,  
 276 (c) the migration rate estimates and (d) the migration time estimates across 18 different com-  
 277 binations of the selection coefficient, the migration time and the population size. The tips of  
 278 the whiskers represent the 2.5%-quantile and the 97.5%-quantile, and the boxes denote the first

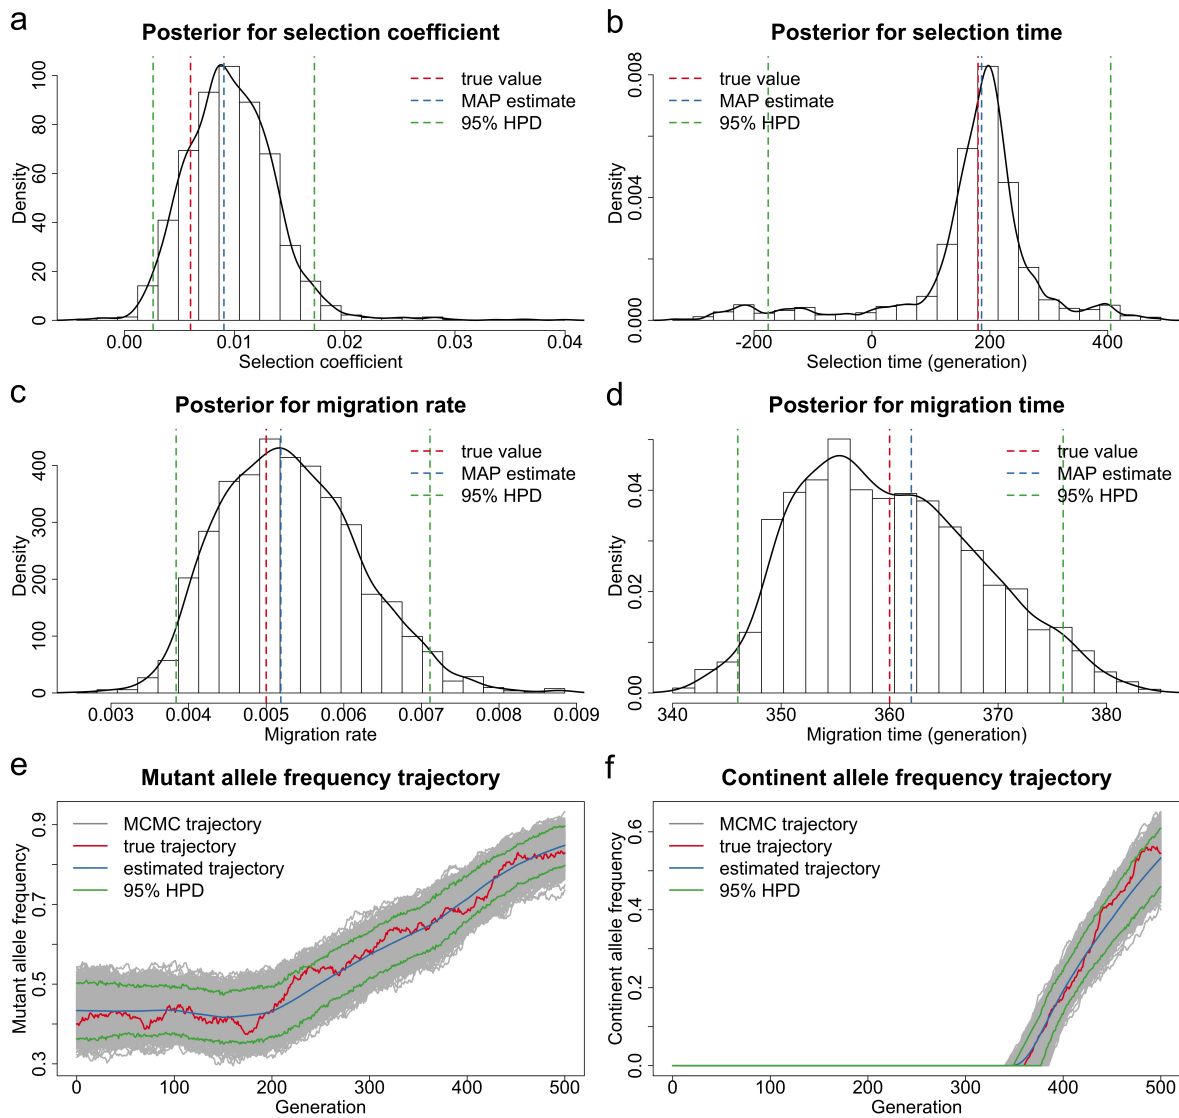

Figure 3: Bayesian estimates for the dataset shown in Figure 1b simulated for the case of continent allele counts unavailable at the first seven sampling time points. Posteriors for (a) the selection coefficient (b) the selection time (c) the migration rate and (d) the migration time. The MAP estimate is for the joint posterior, and may not correspond to the mode of the marginals. Estimated underlying trajectories of (e) the mutant allele frequency and (f) the continent allele frequency of the island population.

279 and third quartiles with the median in the middle. We summarise the bias and the RMSE of  
 280 the estimates in Tables S1 and S2.

281 As shown in Figure 4, our estimates for the selection coefficient and time are approximately  
 282 median-unbiased across 18 different parameter combinations, but the migration rate and time  
 283 are both slightly overestimated (*i.e.*, a small positive bias is found in our estimates). An increase  
 284 in the population size results in the better overall performance of our estimation (*i.e.*, smaller  
 285 bias with smaller variance). In particular, the average proportion of the replicates for which the  
 286 signature of selection can be identified (*i.e.*, the 95% HPD interval does not contain the value of

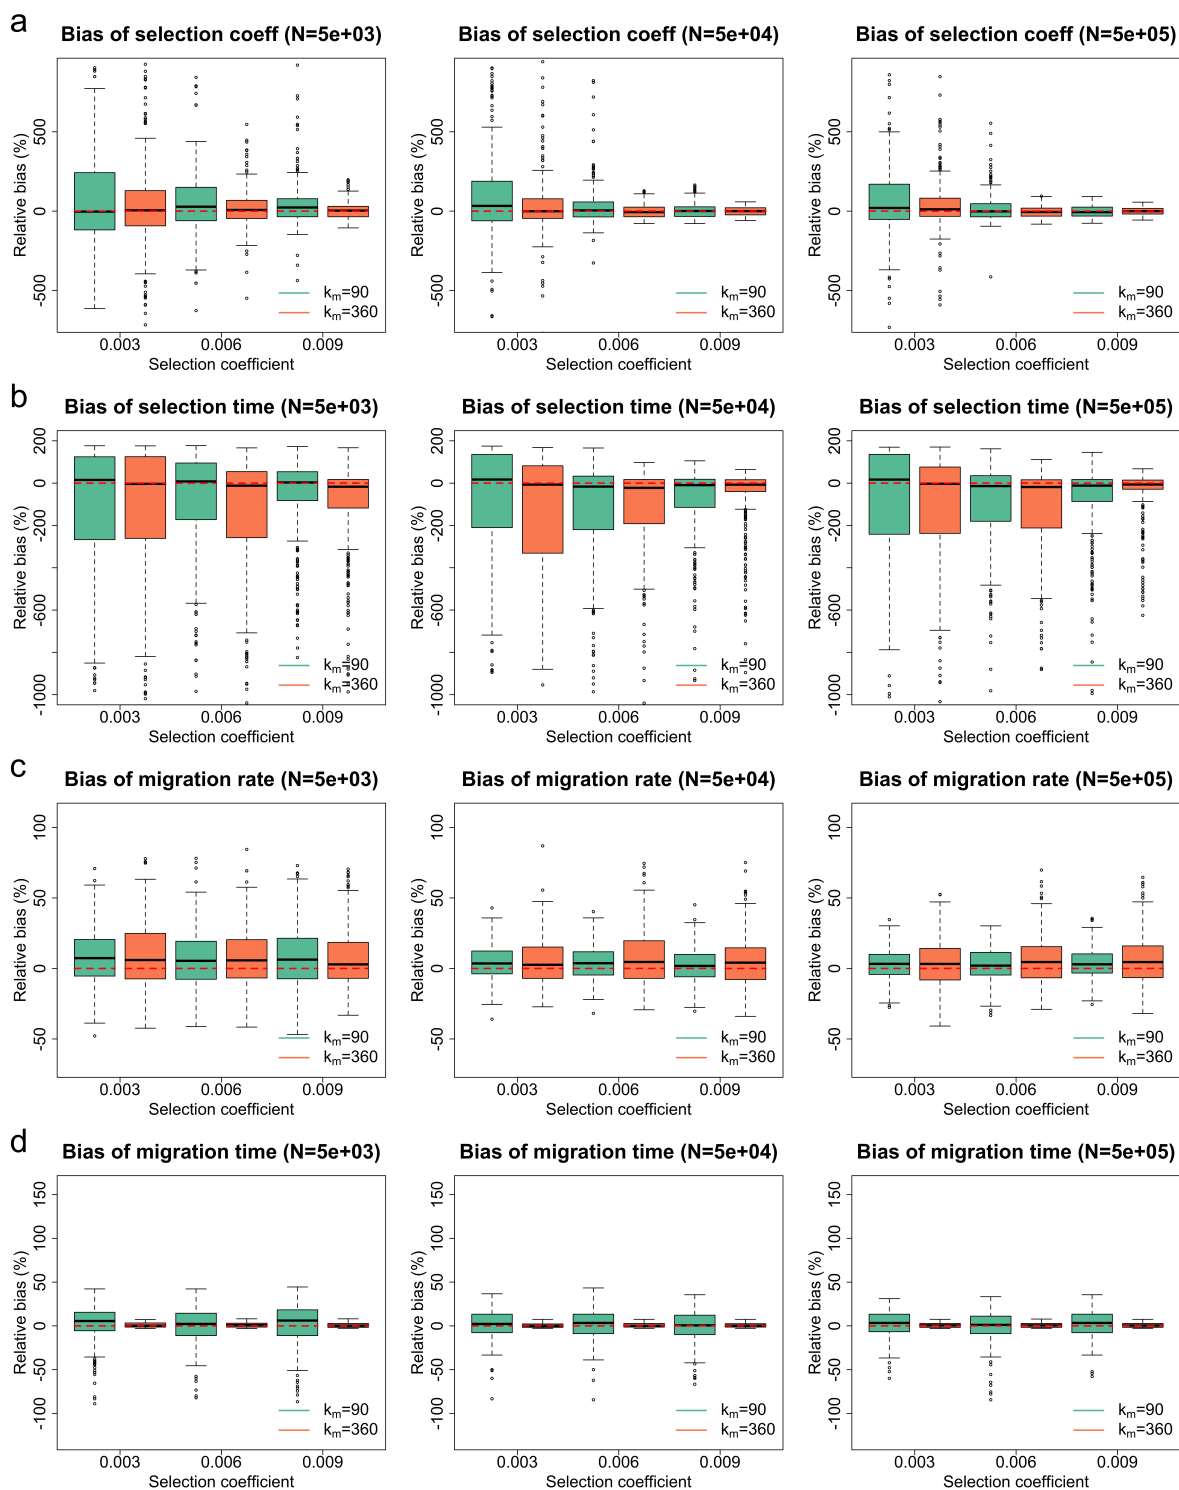

Figure 4: Empirical distributions of the estimates for 300 datasets simulated for additive selection ( $h = 0.5$ ) where continent allele counts are not available at the first three sampling time points. Green boxplots represent the estimates produced for the case of selection starting after migration, and orange boxplots represent the estimates produced for the case of selection starting before migration. Boxplots of the relative bias of (a) the selection coefficient estimates (b) the selection time estimates (c) the migration rate estimates and (d) the migration time estimates. To aid visual comparison, we have picked the  $y$  axes here so that boxes are of a relatively large size. This causes some outliers to lie outside the plots. Boxplots containing all outliers can be found in Figure S1.

287 0) increases from 17.17% to 59.33% and then to 80.67% as the population size increases. Such  
288 an improvement in the performance of our estimation is to be expected since large population  
289 sizes reduce the magnitude of the stochastic effect on the changes in allele frequencies due to  
290 genetic drift, which dilutes evidence of selection and migration.

291 Compared to the case of selection starting after migration (*i.e.*,  $k_m = 90$ ), our estimates for  
292 the case of selection starting before migration (*i.e.*,  $k_m = 360$ ) reveal smaller bias and variances  
293 in both selection coefficient and time. The average proportion of replicates where the signature  
294 of selection can be identified when the migration time  $k_m = 360$  is 15.96% higher than when  
295  $k_m = 90$ . One possible explanation is as follows: if selection begins before migration, there is a  
296 period of time that the allele frequency trajectories of the underlying population are only under  
297 the influence of selection. In contrast, our method performs better for the migration rate when  
298 selection starts after migration (*i.e.*,  $k_m = 90$ ), but the performance for the migration time  
299 deteriorates somewhat unexpectedly when the migration time  $k_m = 360$ . This might be due to  
300 our parameter setting where the starting time of migration is within the period of availability  
301 of continent allele counts for  $k_m = 360$ , but not for  $k_m = 90$ .

302 In addition, we see from Figure 4 that the bias and variance of our estimates for the selection  
303 coefficient and time are largely reduced as the selection coefficient increases, especially in terms  
304 of outliers. The average proportion of the replicates where selection signatures can be identified  
305 increases from 27.56% to 63.11% and then to 66.50% as the selection coefficient increases, with  
306 97.17% for the case of large population size ( $N = 500000$ ) and selection coefficient ( $s = 0.009$ ).  
307 For weak selection, the underlying trajectory of allele frequencies is extremely stochastic so that  
308 it is difficult to disentangle the effects of genetic drift and natural selection (Schraiber et al.,  
309 2013). An increase in the strength of selection leads to more pronounced changes through time  
310 in allele frequencies, making the signature of selection more identifiable. In contrast, an increase  
311 in the selection coefficient has little effect on our estimates of the migration rate and time.

312 In Figure 5, we present the boxplots of our estimates for additive selection ( $h = 0.5$ ) where  
313 continent allele counts are unavailable at the first seven sampling time points, with their bias  
314 and RMSE summarised in Tables S3 and S4. They reveal similar behaviour in estimation bias  
315 and variance, although our estimates for the migration-related parameters show significantly  
316 larger bias and variances, probably resulting from the increased length of time when continent

317 allele counts are not available. This, however, has little effect on our estimation of the selection-  
318 related parameters, with similar average proportions of the replicates where the signature of  
319 selection can be identified (52.39% *vs.* 52.17%).

320 The resulting estimates for dominant selection ( $h = 0$ ) and recessive selection ( $h = 1$ ) can be  
321 found in Figures S3 and S4, respectively, for the case of the population size  $N = 50000$ . They  
322 are very similar to the boxplot results in the empirical studies for additive selection illustrated in  
323 Figures 4 and 5. Their bias and RMSE are summarised in Tables S5-S8. It should be noted that  
324 overall, recessive selection yields the best performance, additive selection next, while dominant  
325 selection yields the worst performance in our simulation studies for the inference of selection.  
326 This is mainly due to our parameter setting, *i.e.*, the effect of selection, when the mutant allele  
327 has been *established* in the population (*e.g.*, our starting mutant allele frequency is 0.4), is the  
328 strongest for recessive selection and weakest for dominant selection (see Figure S5).

329 In conclusion, our approach can produce reasonably accurate joint estimates of the timing  
330 and strength of selection and migration from time series data of allele frequencies across different  
331 parameter combinations. Our estimates for the selection coefficient and time are approximately  
332 median-unbiased, with smaller variances as the population size or the selection coefficient (or  
333 both) increases. Our estimates for the migration rate and time both show little positive bias.  
334 Their performance improves with an increase in population size or the number of the sampling  
335 time points when continent allele counts are available (or both).

### 336 *3.2. Application to ancient chicken samples*

337 We re-analysed aDNA data of 452 European chicken genotyped at the *TSHR* locus (position  
338 43250347 on chromosome 5) from previous studies of Flink et al. (2014) and Loog et al. (2017).  
339 The time from which the data come ranges from approximately 2200 years ago to the present.  
340 The data shown in Table 2 come from grouping the raw chicken samples by their sampling time  
341 points. The raw sample information and genotyping results can be found in Loog et al. (2017).  
342 The derived *TSHR* allele has been associated with reduced aggression to conspecifics and faster  
343 onset of egg laying (Belyaev, 1979; Rubin et al., 2010; Karlsson et al., 2015, 2016), which was  
344 hypothesised to have undergone strong and recent selection in domestic chicken (Rubin et al.,  
345 2010; Karlsson et al., 2015) from the period of time when changes in Medieval dietary preferences  
346 and husbandry practices across northwestern Europe occurred (Loog et al., 2017).

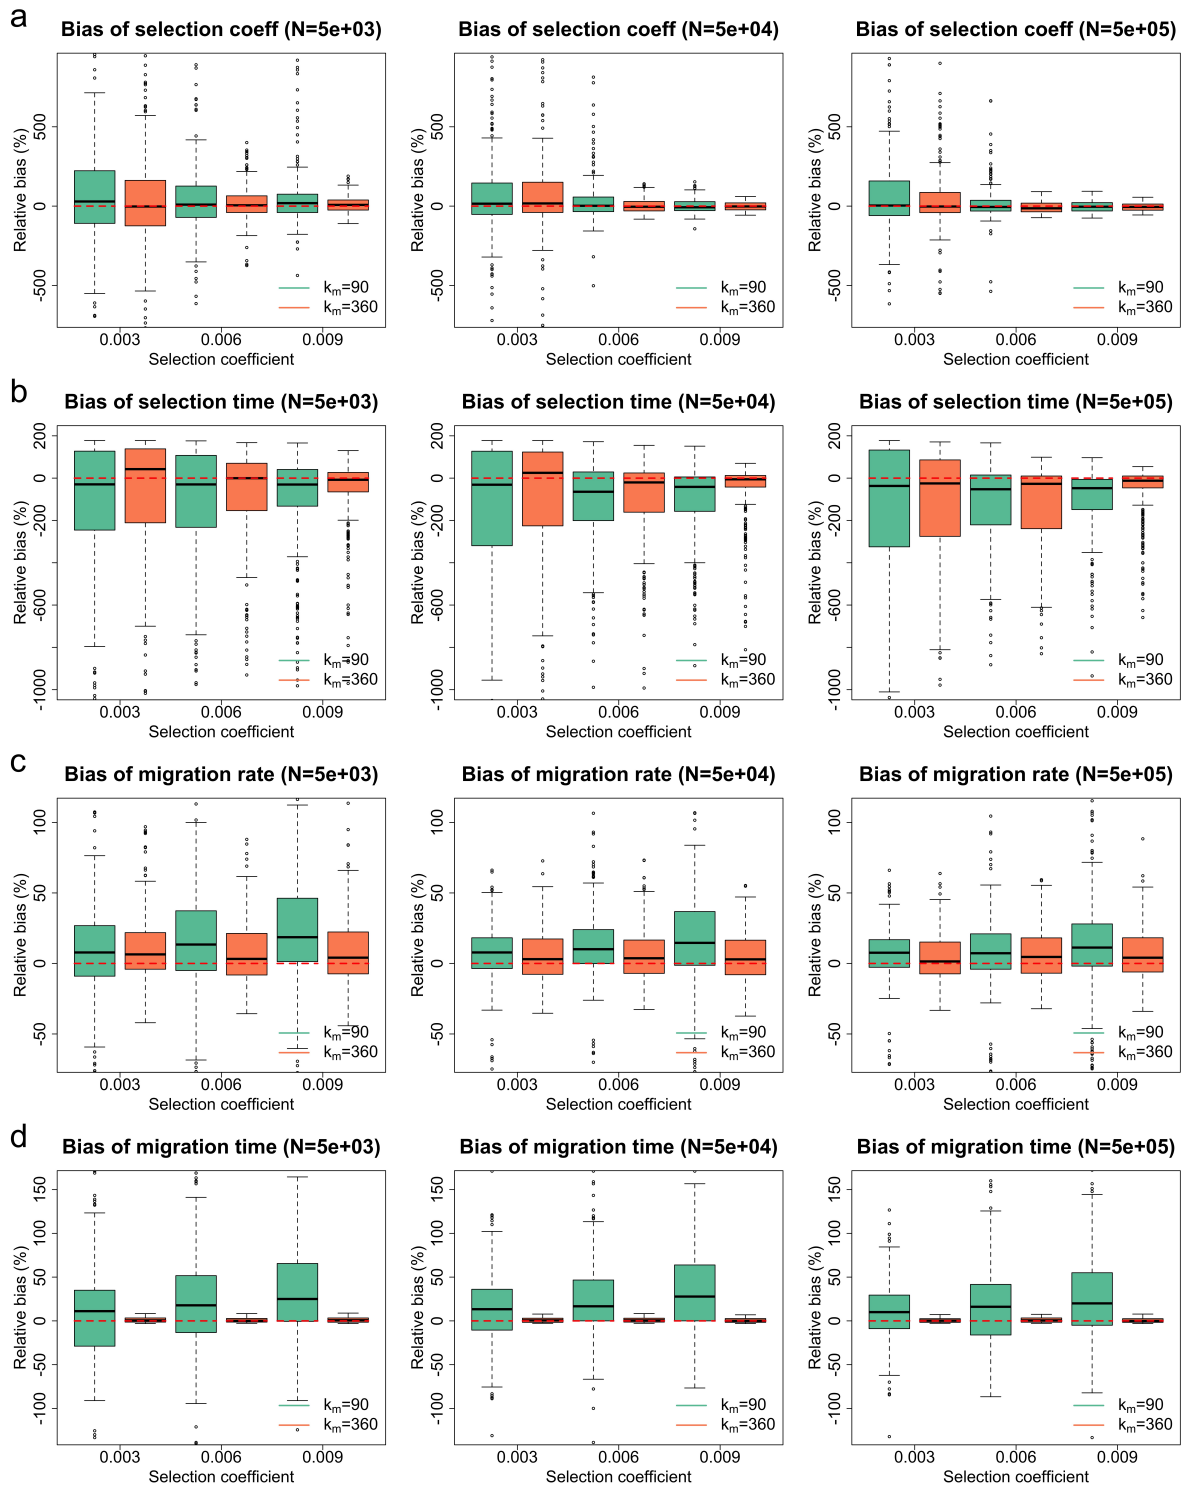

Figure 5: Empirical distributions of the estimates for 300 datasets simulated for additive selection ( $h = 0.5$ ) where continent allele counts are not available at the first seven sampling time points. Green boxplots represent the estimates produced for the case of selection starting after migration, and orange boxplots represent the estimates produced for the case of selection starting before migration. Boxplots of the relative bias of (a) the selection coefficient estimates (b) the selection time estimates (c) the migration rate estimates and (d) the migration time estimates. To aid visual comparison, we have picked the  $y$  axes here so that boxes are of a relatively large size. This causes some outliers to lie outside the plots. Boxplots containing all outliers can be found in Figure S2.



| Sample time | Sample size | Mutant allele |
|-------------|-------------|---------------|
| -128        | 12          | 8             |
| -25         | 8           | 5             |
| 82          | 8           | 3             |
| 200         | 32          | 14            |
| 256         | 14          | 3             |
| 1067        | 6           | 0             |
| 1309        | 20          | 18            |
| 1650        | 2           | 1             |
| 1850        | 2           | 2             |
| 1975        | 14          | 14            |
| 1995        | 334         | 328           |

Table 2: Time serial European chicken samples of segregating alleles at the *TSHR* locus. The unit of the sampling time is the AD year so that positive values denote the AD year *e.g.*, AD 82, and negative values denote the BC year, *e.g.*, 25 BC.

347 To avoid overestimating the effect of selection on allele frequency changes, we model recent  
348 migration in domestic chicken from Asia to Europe in this work. More specifically, the European  
349 chicken population was represented as the island population while the Asian chicken population  
350 was represented as the continent population with a derived *TSHR* allele frequency of  $x_c = 0.99$   
351 fixed from the time of the onset of migration, which is a conservative estimate chosen in Loog  
352 et al. (2017). Migration from Asia in domestic chicken, beginning around 250 years ago and  
353 continuing until the present, was historically well documented (Dana et al., 2011; Flink et al.,  
354 2014; Lyimo et al., 2015). Unlike Loog et al. (2017), we estimated the migration rate along with  
355 the selection coefficient and time by incorporating the estimate reported in Loog et al. (2017)  
356 that about 15% of the modern European chicken have Asia origin. This allows us to obtain the  
357 sample frequency of the allele in European chicken at the most recent sampling time point that  
358 resulted from immigration from Asia. We took the average length of a generation of chicken to  
359 be one year, and the time measured in generations was offset so that the most recent sampling  
360 time point was generation 0.

361 In our analysis, we adopted the dominance parameter  $h = 1$  since the derived *TSHR* allele  
362 is recessive, and picked the population size  $N = 180000$  (95% HPD 26000-460000) estimated by  
363 Loog et al. (2017). We chose a uniform prior over the interval  $[-1, 1]$  for the selection coefficient  
364  $s$  and a uniform prior over the set  $\{-9000, -8999, \dots, 0\}$  for the selection time  $k_s$ , which covers  
365 chicken domestication dated to about 8000 (95% CI 7014–8768) years ago (Lawal et al., 2020).  
366 We picked a uniform prior over the interval  $[0, 1]$  for the migration rate  $m$  and set the migra-

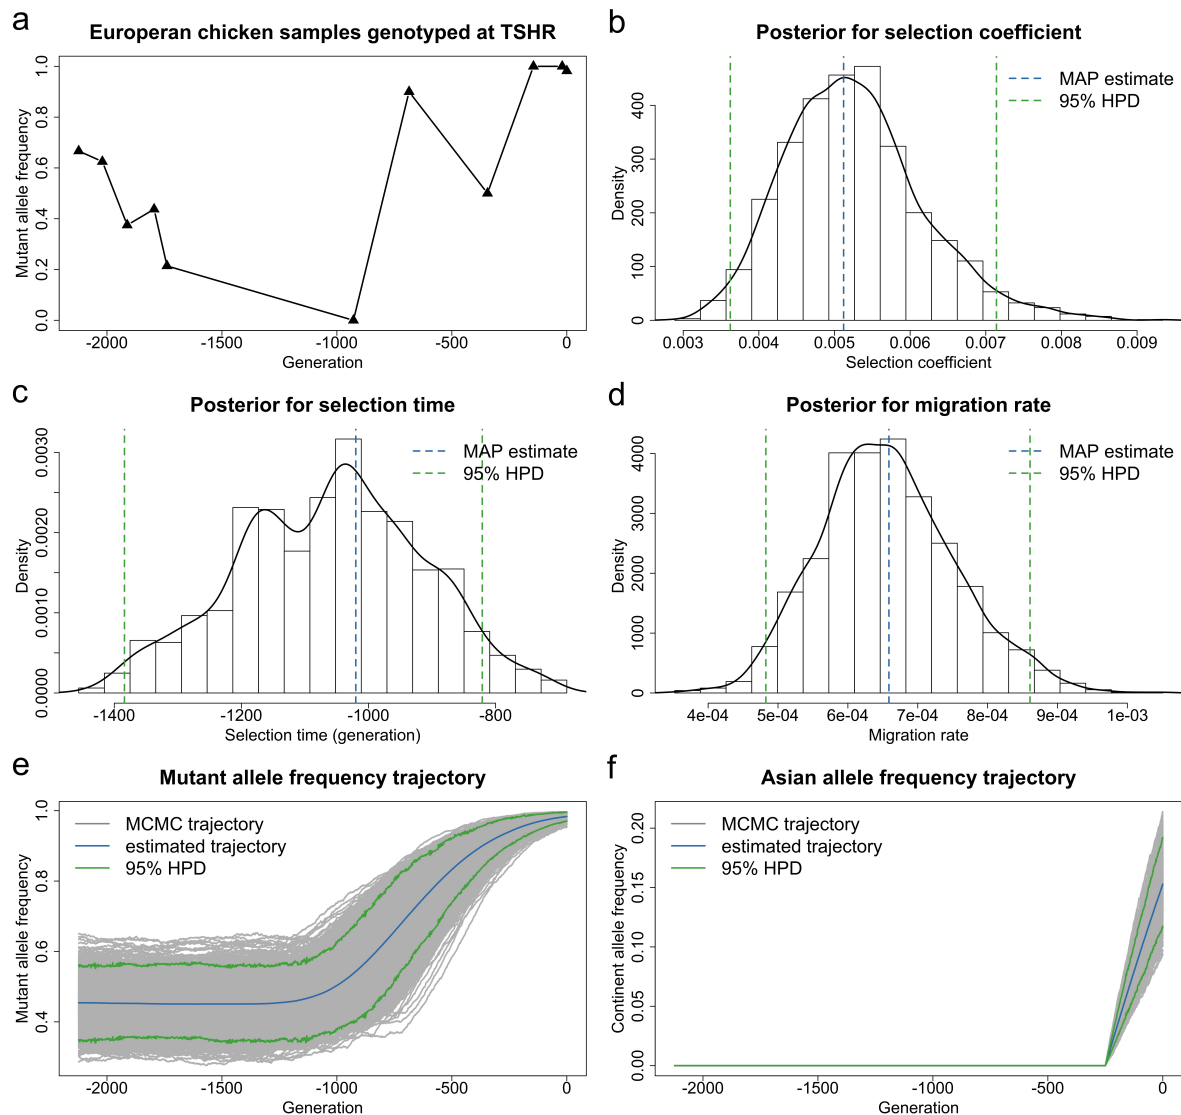

Figure 6: Bayesian estimates for aDNA data of European chicken genotyped at the *TSHR* locus from Loog et al. (2017) for the case of the population size  $N = 180000$ . (a) Temporal changes in the mutant allele frequencies of the sample, where the sampling time points have been offset so that the most recent sampling time point (AD 1995) is generation 0. Posteriors for (b) the selection coefficient (c) the selection time and (d) the migration rate. Estimated underlying trajectories of (e) the mutant allele frequency and (f) the Asian allele frequency in the European chicken population. The MAP estimate is for the joint posterior, and may not correspond to the mode of the marginals.

367 tion time  $k_m = -250$ . All settings in the Euler-Maruyama scheme and the blockwise PMMH  
 368 algorithm are the same as we applied in Section 3.1. The posteriors for the selection coefficient,  
 369 the selection time and the migration rate are illustrated in Figure 6, as well as the estimates for  
 370 the underlying frequency trajectories of the mutant and Asian alleles in the European chicken  
 371 population. The MAP estimates, as well as 95% HPD intervals, are summarised in Table 3.

372 From Table 3, we observe that our estimate of the selection coefficient for the mutant allele  
 373 is 0.005120 with 95% HPD interval  $[0.003591, 0.007064]$ , strong evidence to support the derived

|                       | Population size | MAP      | 95% HPD              |
|-----------------------|-----------------|----------|----------------------|
| Selection coefficient | 26000           | 0.005109 | [0.003622, 0.007141] |
|                       | 180000          | 0.005120 | [0.003591, 0.007064] |
|                       | 460000          | 0.005122 | [0.003648, 0.006578] |
| Selection time        | 26000           | -1047    | [-1659, -857]        |
|                       | 180000          | -1020    | [-1384, -821]        |
|                       | 460000          | -1047    | [-1327, -893]        |
| Migration rate        | 26000           | 0.000712 | [0.000448, 0.000918] |
|                       | 180000          | 0.000659 | [0.000483, 0.000861] |
|                       | 460000          | 0.000620 | [0.000478, 0.000837] |

Table 3: MAP estimates of the selection coefficient, the selection time and the migration rate, as well as their 95% HPD intervals, for *TSHR* achieved with the population size  $N = 26000$ ,  $N = 180000$  and  $N = 460000$ .

374 *TSHR* allele being selectively advantageous in the European chicken population. Such positive  
375 selection results in an increase over time in the mutant allele frequency, starting from AD 975  
376 with 95% HPD interval [611, 1174] (see Figure 6e). The starting frequency of the derived *TSHR*  
377 allele in 128 BC is 0.454200 with 95% HPD interval [0.349024, 0.562094], which is similar to that  
378 estimated in a red junglefowl captive zoo population in Rubin et al. (2010). Our estimate of  
379 the migration rate for the Asian allele is 0.000659 with 95% HPD interval [0.000483, 0.000861].  
380 This migration, starting about 250 years ago, leads to 15.2848% of the European chicken with  
381 Asian ancestry in AD 1995, with 95% HPD interval [0.116412, 0.191382] (see Figure 6f). Our  
382 findings are consistent with those reported in Loog et al. (2017). This is further confirmed by the  
383 results obtained with different values of the population size (*i.e.*,  $N = 26000$  and  $N = 460000$ ,  
384 the lower and upper bounds of 95% HPD interval for the population size given in Loog et al.  
385 (2017), respectively). These results are shown in Figures S6 and S7 and summarised in Table 3.

386 To evaluate the performance of our approach when samples are sparsely distributed in time  
387 with small uneven sizes like the European chicken samples at the *TSHR* locus we have studied  
388 above, we generated 300 simulated datasets that mimic the *TSHR* data, *i.e.*, we used the sample  
389 times and sizes as given in Table 2, the timing and strength of selection and migration as given  
390 by MAP estimates found in Table 3, and population size  $N = 180000$ . From Figure 7, we find  
391 that our simulation studies based on the *TSHR* data yield median-unbiased estimates for the  
392 selection coefficient, the selection time and the migration rate, similar to our performance in the  
393 simulation studies shown in Section 3.1. Moreover, the signature of selection can be identified in  
394 all 300 replicates. This illustrates that our method can achieve good performance even though  
395 samples are sparsely distributed in time with small uneven sizes, which is highly desirable for

396 aDNA data.

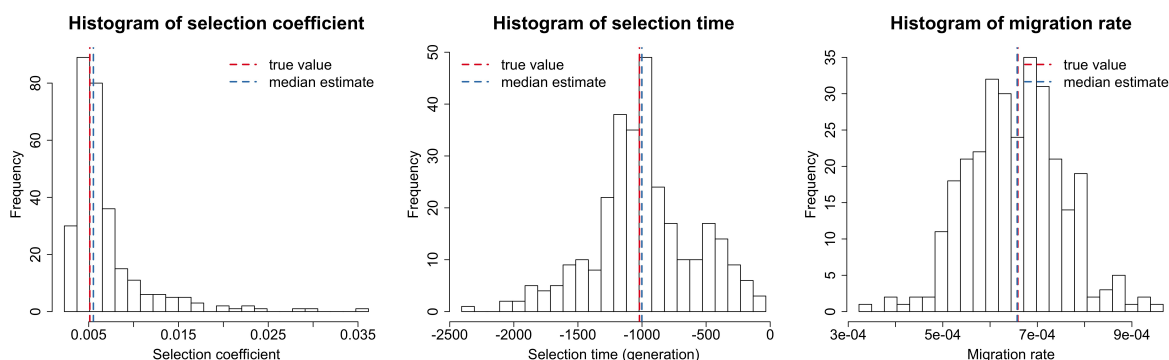

Figure 7: Empirical distributions of the estimates for 300 datasets simulated for *TSHR* based on the aDNA data shown in Table 2. We simulate the underlying population dynamics with the timing and strength of selection and migration estimated with the population size  $N = 180000$  shown in Table 3. To aid visual comparison, we have picked the  $x$  axis in the left panel not to cover all 300 estimates. The histogram containing all 300 estimates can be found in Figure S8.

397 In summary, our approach works well on the ancient chicken samples, even though they are  
398 sparsely distributed in time with small uneven sizes. Our estimates demonstrate strong evidence  
399 for the derived *TSHR* allele being positively selected between the 7th and 12th centuries, which  
400 coincides with the time period of changes in dietary preferences and husbandry practices across  
401 northwestern Europe. This again shows possible links established by Loog et al. (2017) between  
402 the selective advantage of the derived *TSHR* allele and a historically attested cultural shift in  
403 food preference in Medieval Europe.

#### 404 4. Discussion

405 In this work, we introduced a novel MCMC-based procedure for the joint inference of the  
406 timing and strength of selection and migration from aDNA data. To our knowledge, Mathieson  
407 & McVean (2013) and Loog et al. (2017) described the only existing methods that can jointly  
408 infer selection and migration from time series data of allele frequencies. However, the approach  
409 of Mathieson & McVean (2013) cannot estimate the time of the onset of selection and migration.  
410 Loog et al. (2017) only showed the applicability of their approach in the scenario where timing  
411 and strength of migration were both pre-specified. In addition, their method is restricted by the  
412 assumption of infinite population size, which limits the application of their approach to aDNA.

413 Our method was built upon an HMM framework incorporating a multi-allele Wright-Fisher  
414 diffusion with selection and migration. Our estimates for the timing and strength of selection

415 and migration were obtained by the PMMH algorithm with blockwise sampling, which enables  
416 the co-estimation of the underlying trajectories of allele frequencies through time as well. This  
417 is a highly desirable feature for aDNA because it allows us to infer the drivers of selection and  
418 migration by correlating genetic variation patterns with potential evolutionary events such as  
419 changes in the ecological context in which an organism has evolved.

420 We showed through extensive simulation studies that our method could deliver reasonably  
421 accurate estimates for the timing and strength of selection and migration, including the esti-  
422 mates for the underlying trajectories of allele frequencies through time. The estimates for the  
423 selection coefficient and time were largely unbiased, while the estimates for the migration rate  
424 and time showed a slight positive bias. We applied our approach to re-analyse ancient European  
425 chicken samples genotyped at the *TSHR* locus from earlier studies of Flink et al. (2014) and  
426 Loog et al. (2017). We observed that the derived *TSHR* allele became selectively advantageous  
427 from AD 975 (95% HPD 611-1174), which was similar to that reported in Loog et al. (2017).  
428 Our results further confirmed the findings of Loog et al. (2017) that positive selection acting on  
429 the derived *TSHR* allele in European chicken could be driven by chicken intensification and egg  
430 production in Medieval Europe as a result of Christian fasting practices (*i.e.*, the consumption  
431 of birds, eggs and fish became allowed (Venarde, 2011)). Except for religiously inspired dietary  
432 preferences, this could also be a result of changes in Medieval husbandry practices along with  
433 population growth and urbanisation in the High Middle Ages (around AD 1000-1250). See Loog  
434 et al. (2017) and references cited therein for more details.

435 Unlike Loog et al. (2017), our approach models genetic drift. From Table 3, we observe that  
436 our estimates from aDNA data for *TSHR* are close to each other regardless of what population  
437 size we choose from the 95% HPD interval for the European chicken population size reported  
438 in Loog et al. (2017). This indicates that ignoring genetic drift might have little effect on the  
439 inference of selection from aDNA data like those in Loog et al. (2017). To further investigate the  
440 effect of genetic drift, we simulated 300 datasets based on the aDNA data for *TSHR*, where the  
441 timing and strength of selection and migration were taken to be our estimates given in Table 3  
442 but the true population size was taken to be  $N = 4500$ . We ran our method with a misspecified  
443 population size  $N = 180000$  for these 300 replicates and find that this larger population size  
444 leads to significant overestimation of the selection coefficient and time with much larger variance

445 (see Figure 8), which implies the necessity of modelling genetic drift in the inference of selection  
446 from aDNA data.

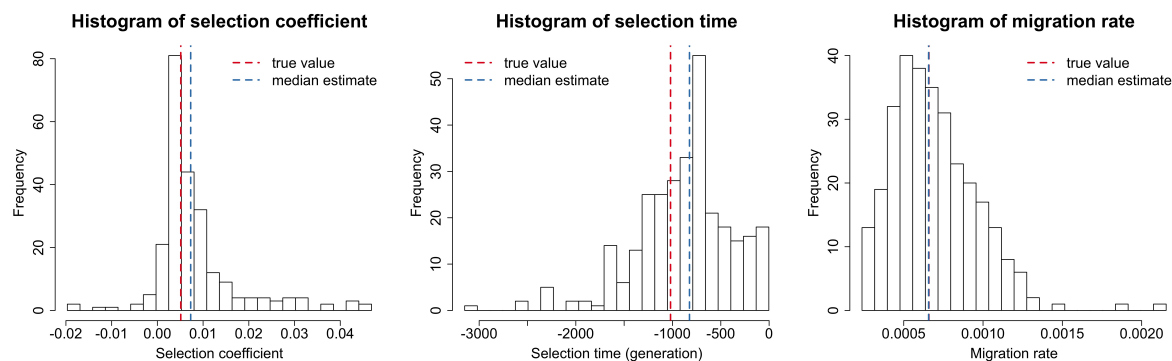

Figure 8: Empirical distributions of the estimates for 300 datasets simulated for *TSHR* based on the aDNA data presented in Table 2. We take the timing and strength of selection and migration to be those estimated with the population size  $N = 180000$  given in Table 3, but the true population size in the simulation is taken to be  $N = 4500$ . To aid visual comparison, we have picked the  $x$  axis in the left panel not to cover all 300 estimates. The histogram containing all 300 estimates can be found in Figure S9.

447 We explored how misspecification of genetic dominance or gene migration affects our infer-  
448 ence of selection and migration in a similar way. We first simulated 300 datasets based on the  
449 aDNA data for *TSHR* with the dominance parameter  $h = 0$  and  $h = 0.5$ , respectively, but we  
450 ran our inference procedure with a misspecified dominance parameter  $h = 1$ . As shown in Fig-  
451 ure 9, we find that a misspecified dominance parameter introduces certain bias in the inference  
452 results for both selection and migration. We then simulated 300 datasets based on the aDNA  
453 data for *TSHR* with the migration rate  $m = 0.00001$  and  $m = 0.01$ , respectively, but we ran our  
454 procedure with a misspecified migration rate  $m = 0.000659$  (*i.e.*, the migration rate estimated  
455 with the population size  $N = 180000$ ). We observe from Figure 10 that a misspecified migration  
456 rate does not dramatically alter the posterior median of the selection coefficient and time but  
457 significantly increase the variance of their estimates. Finally, we simulated 300 datasets based  
458 on the aDNA data for *TSHR* with the migration time  $k_m = -400$  and  $k_m = -100$ , respectively,  
459 but we ran our procedure with a misspecified migration time  $k_m = -250$ . From Figure 11, we  
460 see that a misspecified migration time has little effect on the inference of selection but dramat-  
461 ically alter the estimate of the migration rate. All these results show the necessity of the joint  
462 inference of selection and migration from aDNA data.

463 In this work, we have focused on the continent-island model under the assumption that the  
464 allele frequencies of the continent population are fixed over time. As has been previously noted

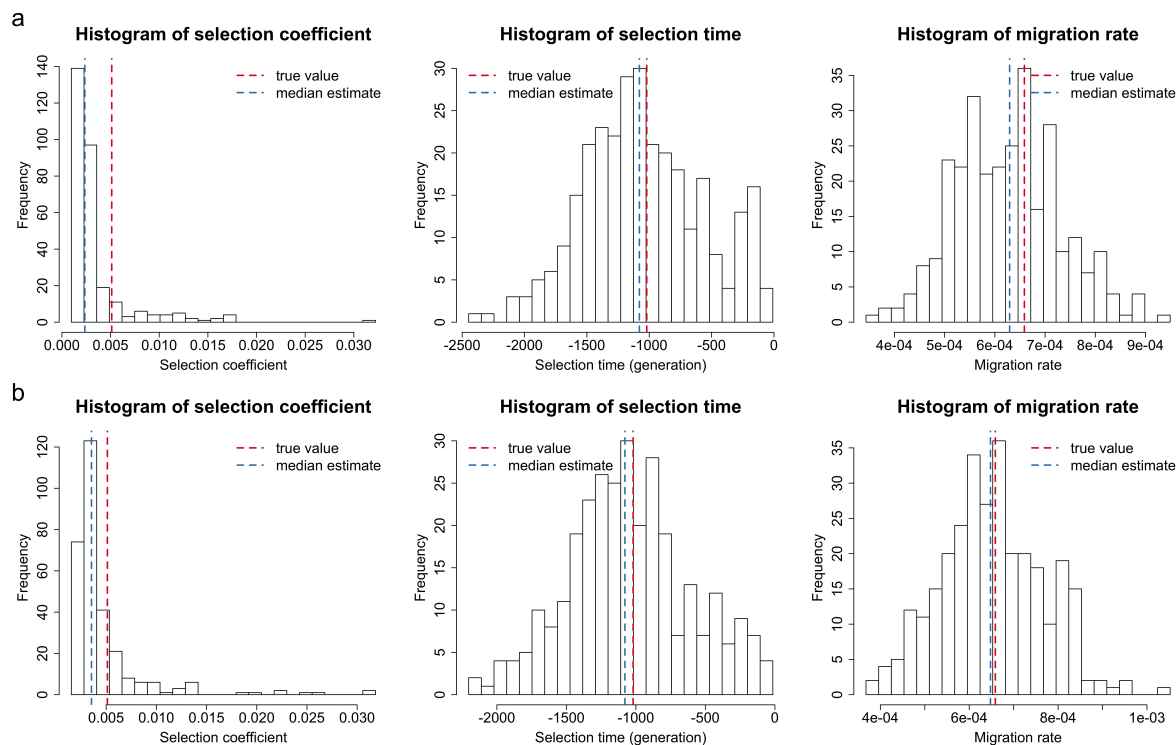

Figure 9: Empirical distributions of the estimates for 300 datasets simulated for *TSHR* based on the aDNA data presented in Table 2. We take the timing and strength of selection and migration to be those estimated with the population size  $N = 180000$  given in Table 3, but the true dominance parameter in the simulation is taken to be (a)  $h = 0$  and (b)  $h = 0.5$ , respectively. To aid visual comparison, we have picked the  $x$  axis in the left panel not to cover all 300 estimates. The histogram containing all 300 estimates can be found in Figure S10.

465 in the context of methods for detecting local adaptation (Lotterhos & Whitlock, 2015), caution  
 466 must be exercised when applying to scenarios outside those that are validated in this study.  
 467 Researchers may straightforwardly simulate test datasets under models that more closely reflect  
 468 the assumptions of their study system (Haller & Messer, 2019) to investigate the robustness of  
 469 our approach for their data.

470 Our Bayesian framework lends itself to being extended to more complex models of selection  
 471 and migration. For example, we can allow the continent population to evolve under the Wright-  
 472 Fisher diffusion with selection, therefore enabling us to model genetic drift and natural selection  
 473 in the continent population. In this scenario, we need to simulate the underlying allele frequency  
 474 trajectories of the continent population while we simulate those of the island population in our  
 475 PMMH. If the continent population has been well studied, *i.e.*, all required population genetic  
 476 quantities can be pre-specified, our method is expected to have similar performance to this work.  
 477 Otherwise, time serial samples from the continent population are required so that our method  
 478 can be extended to the joint inference of selection acting on the continent population, where the



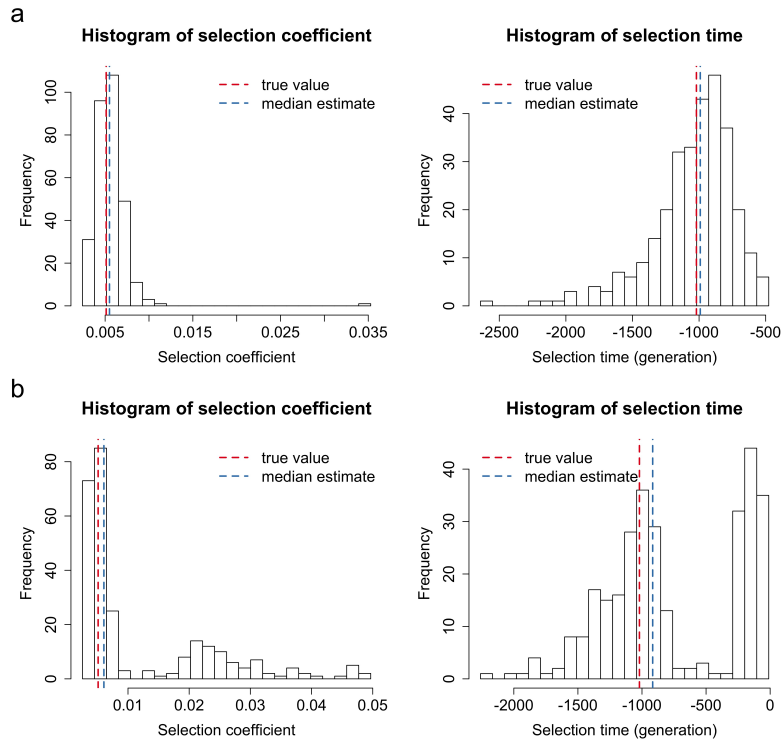

Figure 10: Empirical distributions of the estimates for 300 datasets simulated for *TSHR* based on the aDNA data presented in Table 2. We take the timing and strength of selection and migration to be those estimated with the population size  $N = 180000$  given in Table 3, but the true migration rate in the simulation is taken to be (a)  $m = 0.0001$  and (b)  $m = 0.001$ , respectively. To aid visual comparison, we have picked the  $x$  axis in the left panel not to cover all 300 estimates. The histogram containing all 300 estimates can be found in Figure S11.

479 likelihood will depend on the samples from both the island and continent populations, and the  
 480 selection-related parameters for the continent population are updated as an additional block.  
 481 In a similar manner, we can also allow gene migration to change the genetic composition of the  
 482 continent population, *i.e.*, the two-island model. Our approach is also readily applicable to the  
 483 case of time-varying demographic histories such as Schraiber et al. (2016) and He et al. (2020c),  
 484 but it may suffer from particle degeneracy and impoverishment issues if we extend our method  
 485 to jointly estimate the allele age, which results from low-frequency mutant alleles at the early  
 486 stage facing a higher probability of being lost.

487 It is possible to extend our procedure to handle the case of multiple islands or multiple loci.  
 488 For multiple islands, our method will be more computationally demanding with an increase in  
 489 the number of demes, but improvements to exact-approximate particle filtering techniques such  
 490 as the PMMH algorithm continue to be developed (see, *e.g.*, Yildirim et al., 2018). For multiple  
 491 (independent) loci, computational costs can be greatly reduced by updating the selection-related  
 492 parameters for different loci on different cores in parallel. Our approach can be readily extended

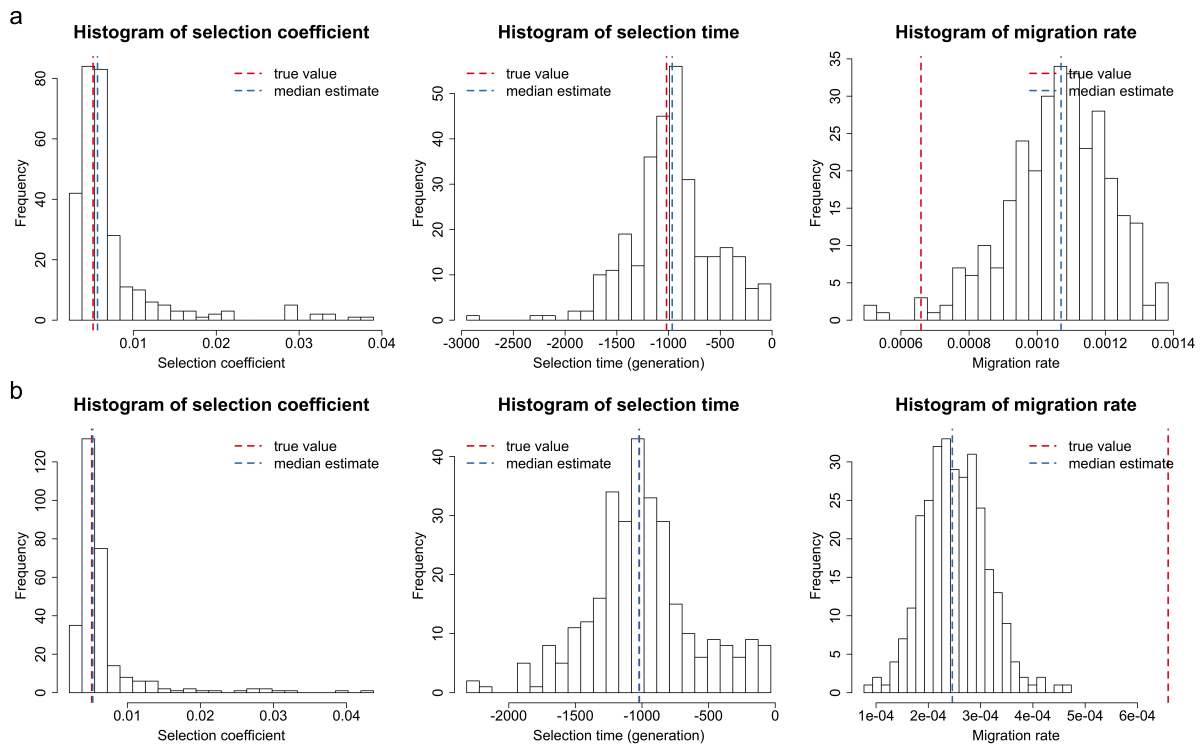

Figure 11: Empirical distributions of the estimates for 300 datasets simulated for *TSHR* based on the aDNA data presented in Table 2. We take the timing and strength of selection and migration to be those estimated with the population size  $N = 180000$  given in Table 3, but the true migration time in the simulation is taken to be (a)  $k_m = -400$  and (b)  $k_m = -100$ , respectively. To aid visual comparison, we have picked the  $x$  axis in the left panel not to cover all 300 estimates. The histogram containing all 300 estimates can be found in Figure S12.

493 to the case of two linked loci by incorporating the method of He et al. (2020b), where modelling  
 494 local linkage among loci has been illustrated to be capable of further improving the inference  
 495 of selection, but such an extension will probably be computationally prohibitive in the case of  
 496 multiple linked loci. As a tractable alternative for multiple linked loci, we can use our two-locus  
 497 method in a pairwise manner by adding additional blocks in blockwise sampling.

## 498 Acknowledgements

499 We are grateful to the communicating editors and the anonymous reviewers for their helpful  
 500 comments on the earlier version of this work.

## 501 References

502 Andrieu, C., Doucet, A., & Holenstein, R. (2010). Particle Markov chain Monte Carlo methods.  
 503 *Journal of the Royal Statistical Society: Series B (Statistical Methodology)*, 72, 269–342.

- 504 Belyaev, D. K. (1979). Destabilizing selection as a factor in domestication. *Journal of Heredity*,  
505 70, 301–308.
- 506 Bollback, J. P., York, T. L., & Nielsen, R. (2008). Estimation of  $2N_e s$  from temporal allele  
507 frequency data. *Genetics*, 179, 497–502.
- 508 Cherry, J. L., & Wakeley, J. (2003). A diffusion approximation for selection and drift in a  
509 subdivided population. *Genetics*, 163, 421–428.
- 510 Dana, N., Megens, H.-J., Crooijmans, R. P. M. A., Hanotte, O., Mwacharo, J. et al. (2011).  
511 East Asian contributions to Dutch traditional and western commercial chickens inferred from  
512 mtDNA analysis. *Animal Genetics*, 42, 125–133.
- 513 Dehasque, M., Ávila-Arcos, M. C., Díez-del Molino, D., Fumagalli, M., Guschanski, K. et al.  
514 (2020). Inference of natural selection from ancient DNA. *Evolution Letters*, 4, 94–108.
- 515 Durrett, R. (2008). *Probability Models for DNA Sequence Evolution*. New York: Springer-  
516 Verlag.
- 517 Ferrer-Admetlla, A., Leuenberger, C., Jensen, J. D., & Wegmann, D. (2016). An approximate  
518 Markov model for the Wright-Fisher diffusion and its application to time series data. *Genetics*,  
519 203, 831–846.
- 520 Fisher, R. A. (1922). On the dominance ratio. *Proceedings of the Royal Society of Edinburgh*,  
521 42, 321–341.
- 522 Flink, L. G., Allen, R., Barnett, R., Malmström, H., Peters, J. et al. (2014). Establishing the  
523 validity of domestication genes using DNA from ancient chickens. *Proceedings of the National*  
524 *Academy of Sciences*, 111, 6184–6189.
- 525 Gordon, N. J., Salmond, D. J., & Smith, A. F. M. (1993). Novel approach to nonlinear/non-  
526 Gaussian Bayesian state estimation. *IEEE Proceedings F (Radar and Signal Processing)*, 140,  
527 107–113.
- 528 Haller, B. C., & Messer, P. W. (2019). SLiM 3: Forward genetic simulations beyond the  
529 Wright-Fisher model. *Molecular Biology and Evolution*, 36, 632–637.

- 530 Hamilton, M. (2011). *Population Genetics*. Chichester: Wiley-Blackwell.
- 531 He, Z., Beaumont, M. A., & Yu, F. (2020a). Numerical simulation of the two-locus Wright-Fisher  
532 stochastic differential equation with application to approximating transition probability den-  
533 sities. *bioRxiv*, (p. 213769).
- 534 He, Z., Dai, X., Beaumont, M. A., & Yu, F. (2020b). Detecting and quantifying natural selection  
535 at two linked loci from time series data of allele frequencies with forward-in-time simulations.  
536 *Genetics*, *216*, 521–541.
- 537 He, Z., Dai, X., Beaumont, M. A., & Yu, F. (2020c). Estimation of natural selection and allele  
538 age from time series allele frequency data using a novel likelihood-based approach. *Genetics*,  
539 *216*, 463–480.
- 540 Izenman, A. J. (1991). Recent developments in nonparametric density estimation. *Journal of*  
541 *the American Statistical Association*, *86*, 205–224.
- 542 Karlsson, A.-C., Fallahshahroudi, A., Johnsen, H., Hagenblad, J., Wright, D. et al. (2016). A  
543 domestication related mutation in the thyroid stimulating hormone receptor gene (*TSHR*)  
544 modulates photoperiodic response and reproduction in chickens. *General and Comparative*  
545 *Endocrinology*, *228*, 69–78.
- 546 Karlsson, A.-C., Svemer, F., Eriksson, J., Darras, V. M., Andersson, L. et al. (2015). The  
547 effect of a mutation in the thyroid stimulating hormone receptor (TSHR) on development,  
548 behaviour and TH levels in domesticated chickens. *PLoS One*, *10*, e0129040.
- 549 Lawal, R. A., Martin, S. H., Vanmechelen, K., Vereijken, A., Silva, P. et al. (2020). The wild  
550 species genome ancestry of domestic chickens. *BMC Biology*, *18*, 1–18.
- 551 Loog, L., Thomas, M. G., Barnett, R., Allen, R., Sykes, N. et al. (2017). Inferring allele  
552 frequency trajectories from ancient DNA indicates that selection on a chicken gene coincided  
553 with changes in medieval husbandry practices. *Molecular Biology and Evolution*, *34*, 1981–  
554 1990.
- 555 Lotterhos, K. E., & Whitlock, M. C. (2015). The relative power of genome scans to detect  
556 local adaptation depends on sampling design and statistical method. *Molecular Ecology*, *24*,  
557 1031–1046.

- 558 Ludwig, A., Pruvost, M., Reissmann, M., Benecke, N., Brockmann, G. A. et al. (2009). Coat  
559 color variation at the beginning of horse domestication. *Science*, *324*, 485–485.
- 560 Lyimo, C. M., Weigend, A., Msoffe, P. L., Hocking, P. M., Simianer, H. et al. (2015). Maternal  
561 genealogical patterns of chicken breeds sampled in Europe. *Animal Genetics*, *46*, 447–451.
- 562 Malaspinas, A.-S. (2016). Methods to characterize selective sweeps using time serial samples:  
563 an ancient DNA perspective. *Molecular Ecology*, *25*, 24–41.
- 564 Malaspinas, A.-S., Malaspinas, O., Evans, S. N., & Slatkin, M. (2012). Estimating allele age  
565 and selection coefficient from time-serial data. *Genetics*, *192*, 599–607.
- 566 Mathieson, I., Lazaridis, I., Rohland, N., Mallick, S., Patterson, N. et al. (2015). Genome-wide  
567 patterns of selection in 230 ancient Eurasians. *Nature*, *528*, 499–503.
- 568 Mathieson, I., & McVean, G. (2013). Estimating selection coefficients in spatially structured  
569 populations from time series data of allele frequencies. *Genetics*, *193*, 973–984.
- 570 Rubin, C.-J., Zody, M. C., Eriksson, J., Meadows, J. R. S., Sherwood, E. et al. (2010). Whole-  
571 genome resequencing reveals loci under selection during chicken domestication. *Nature*, *464*,  
572 587–591.
- 573 Schraiber, J. G., Evans, S. N., & Slatkin, M. (2016). Bayesian inference of natural selection  
574 from allele frequency time series. *Genetics*, *203*, 493–511.
- 575 Schraiber, J. G., Griffiths, R. C., & Evans, S. N. (2013). Analysis and rejection sampling of  
576 Wright-Fisher diffusion bridges. *Theoretical Population Biology*, *89*, 64–74.
- 577 Steinrücken, M., Bhaskar, A., & Song, Y. S. (2014). A novel spectral method for inferring  
578 general diploid selection from time series genetic data. *The Annals of Applied Statistics*, *8*,  
579 2203–2222.
- 580 Venarde, B. L. (2011). *The Rule of Saint Benedict*. Cambridge, Massachusetts: Harvard  
581 University Press.
- 582 Wright, S. (1931). Evolution in Mendelian populations. *Genetics*, *16*, 97–159.

583 Yıldırım, S., Andrieu, C., & Doucet, A. (2018). Scalable Monte Carlo inference for state-space  
584 models. [arXiv:1809.02527](#).

### 585 **Data Accessibility Statement**

586 The authors state that all data necessary for confirming the conclusions of this work are  
587 represented fully within the article. Source code implementing the method described in this work  
588 is available at <https://github.com/zhangyi-he/WFM-1L-DiffusApprox-PMMH-Chicken>.

### 589 **Author Contributions**

590 F.Y. and Z.H. designed the project and developed the method; W.L. and Z.H. implemented  
591 the method; W.L. and X.D. analysed the data under the supervision of M.B., F.Y. and Z.H.;  
592 W.L., X.D. and Z.H. wrote the manuscript; M.B. and F.Y. reviewed the manuscript.
